# Supplementary material for: Direct molecular dissection of tumor parenchyma from tumor stroma in tumor xenograft using mass spectrometry-based glycoproteomics
Source: PubMed Central journal article supplement (PMC5995176; doi:10.18632/oncotarget.25449), 2018-05-29
Supplement: oncotarget-09-26431-s001.pdf [file oncotarget-09-26431-s001.pdf]

## Direct molecular dissection of tumor parenchyma from tumor stroma in tumor xenograft using mass spectrometry-based glycoproteomics

### SUPPLEMENTARY MATERIALS

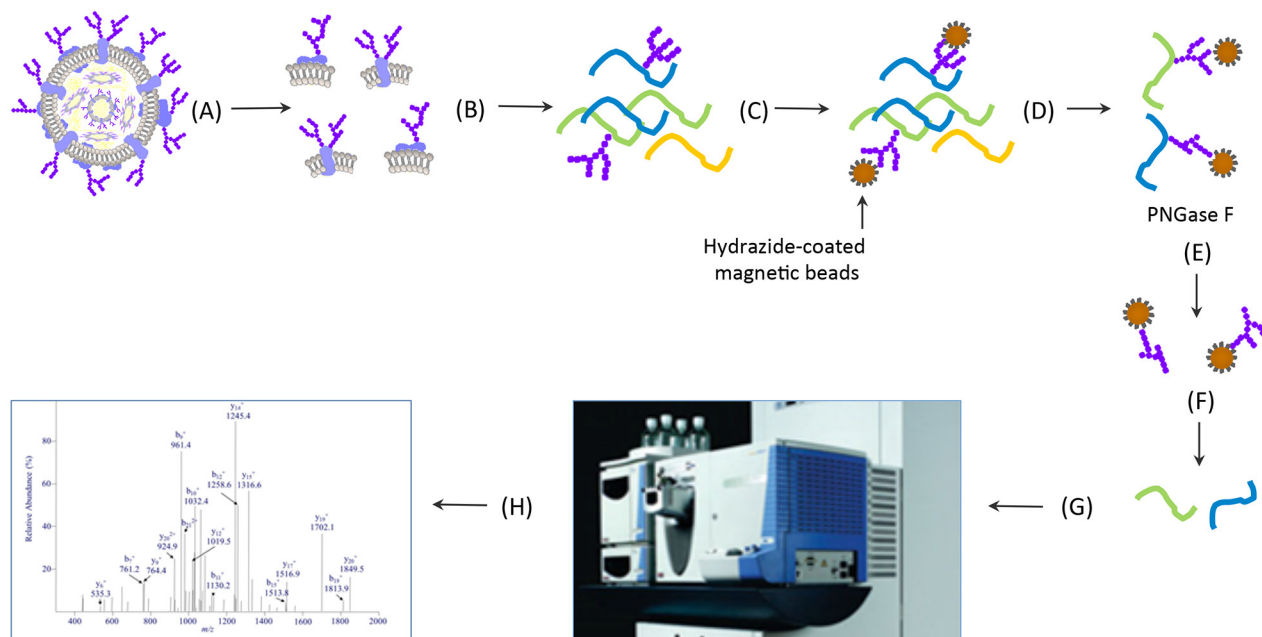

**Supplementary Figure 1: Glycoproteomic workflow.** (A) Tissue homogenization. (B) Tryptic digestion. (C) Oxidation and hydrazide-beads conjugation. (D) non-glycopeptide removal. (E) PNGase F based glycan removal. (F) N-glycopeptides collection. (G) LC-MS analysis. (H) Protein identification.

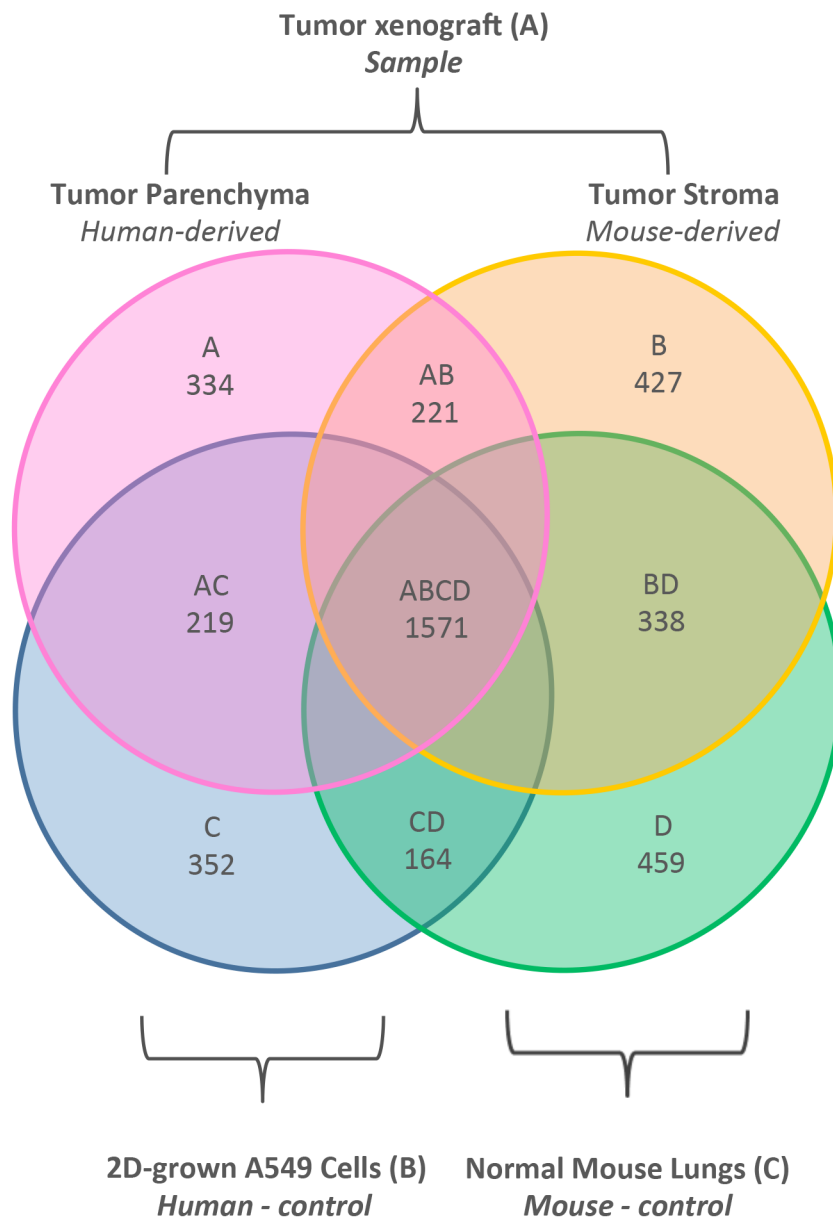

**Supplementary Figure 2: Distribution of N-glycoproteins proteins identified by at least one protein and species specific N-glycopeptide.**

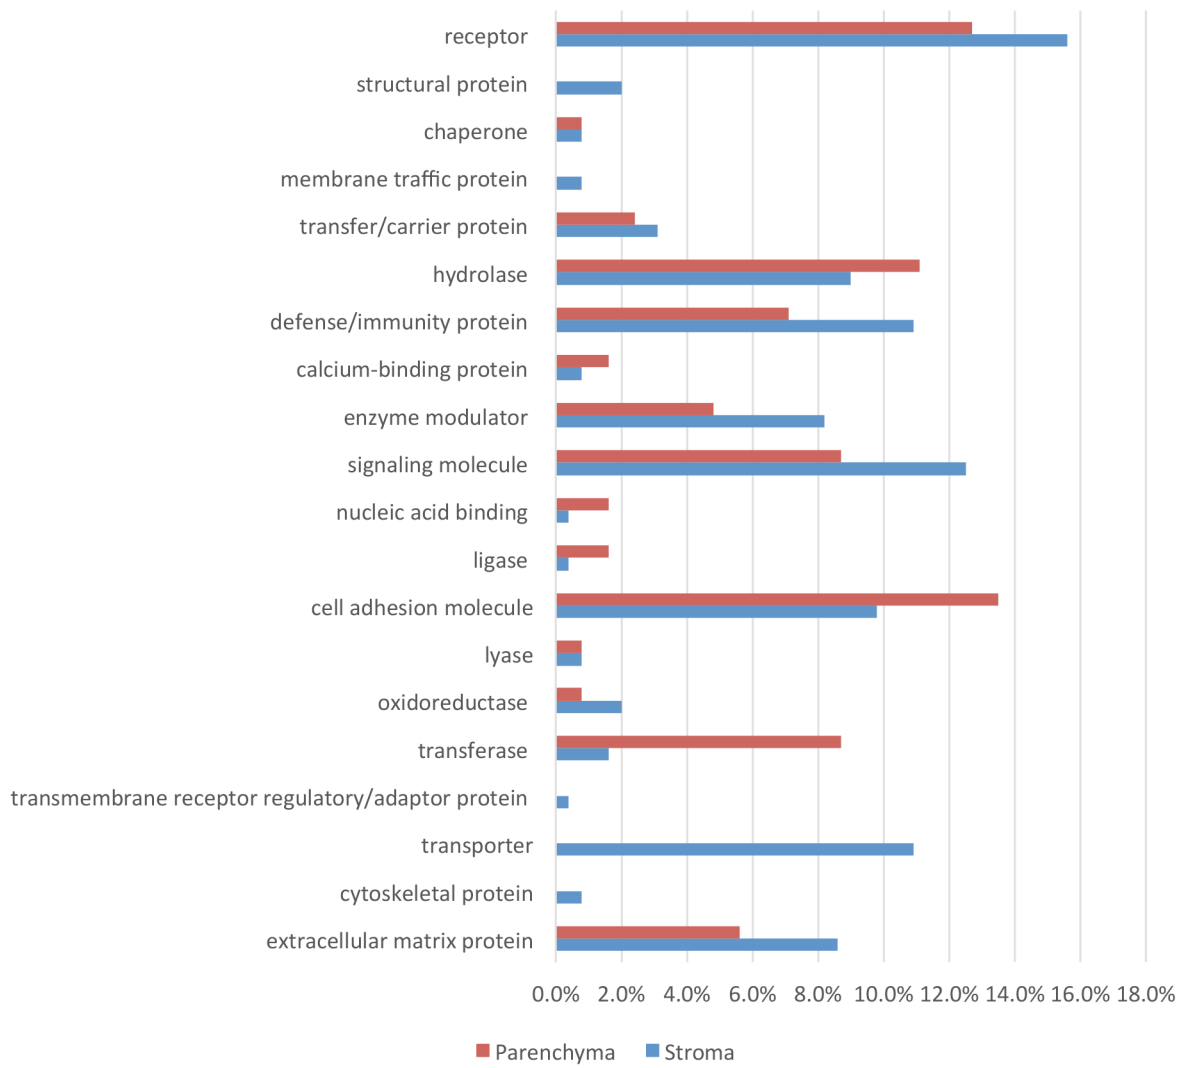

**Supplementary Figure 3: Protein class analysis using the PANTHER software.**

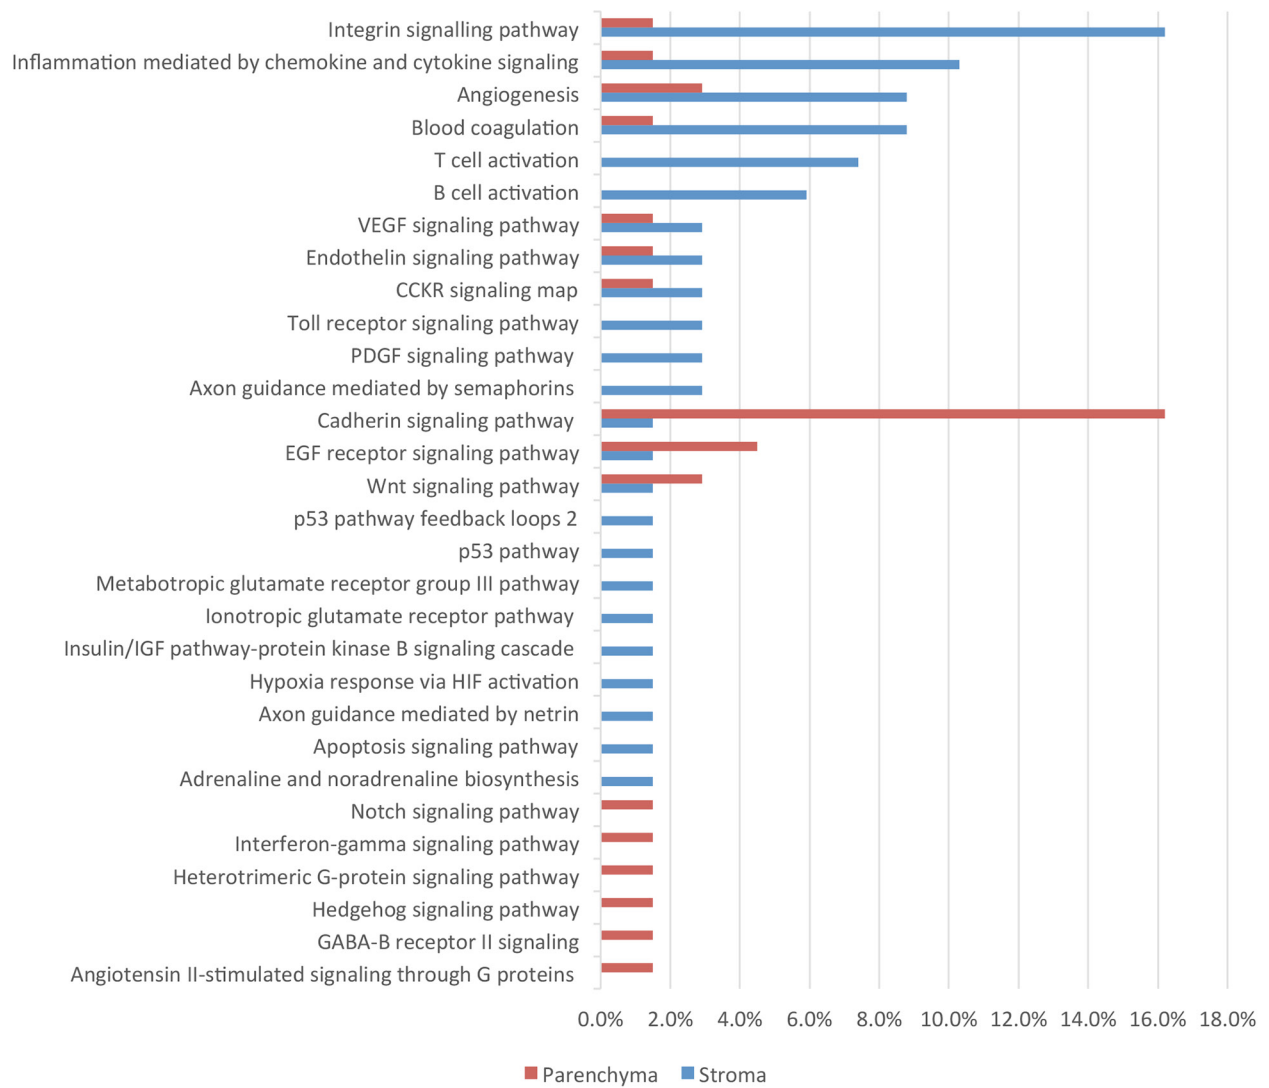

**Supplementary Figure 4: Pathway analysis using the PANTHER software.**



Network Analysis: Malignant Tumor Invasion

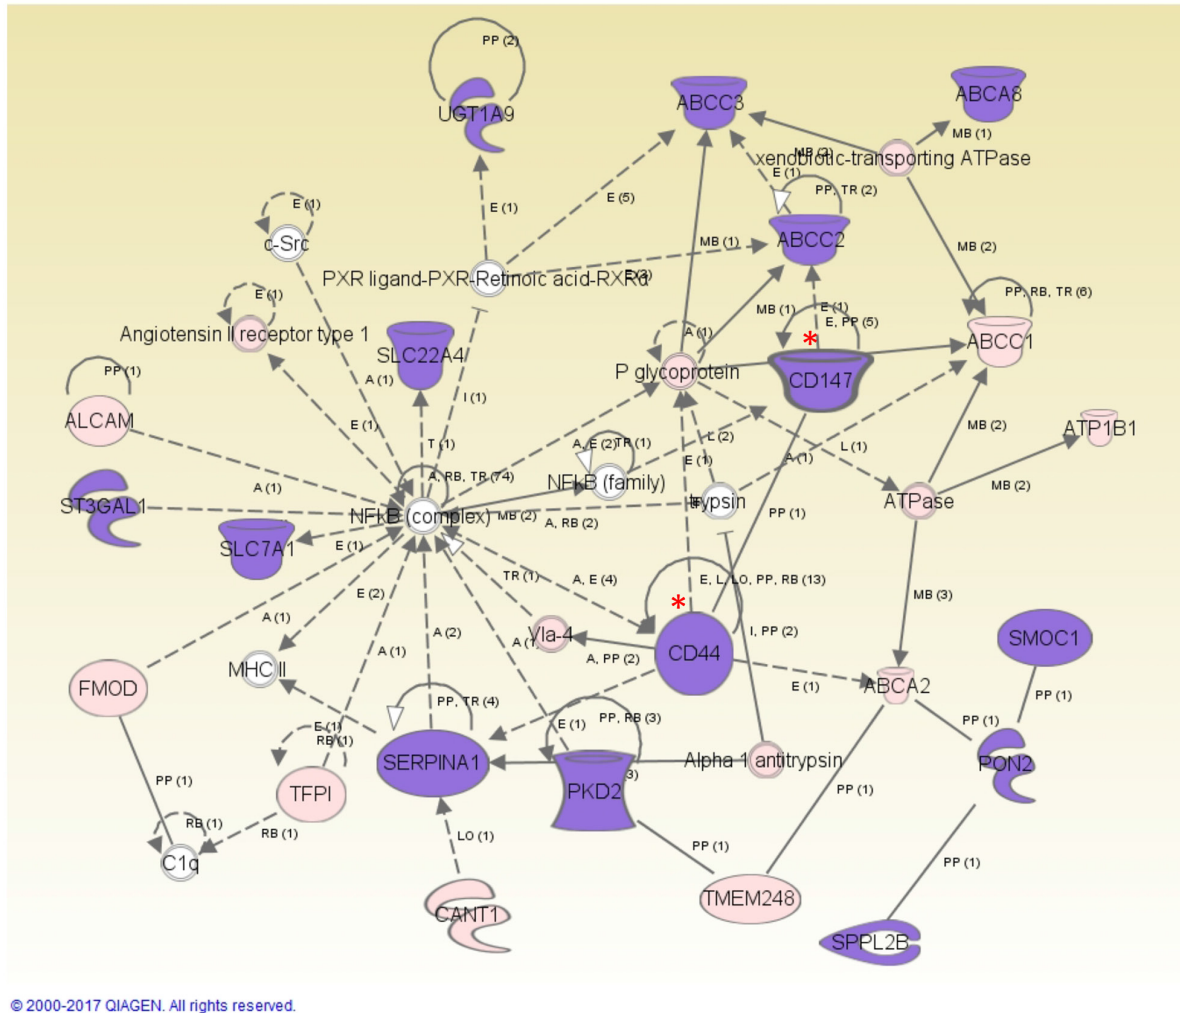

© 2000-2017 QIAGEN. All rights reserved.

**Supplementary Figure 5: IPA® analysis reveals malignant tumor invasion as one of top N-glycosylated protein networks activated in tumor parenchyma.** Molecules selected for orthogonal cross-validation (i.e., CD147 and CD44) are marked with red asterisk.

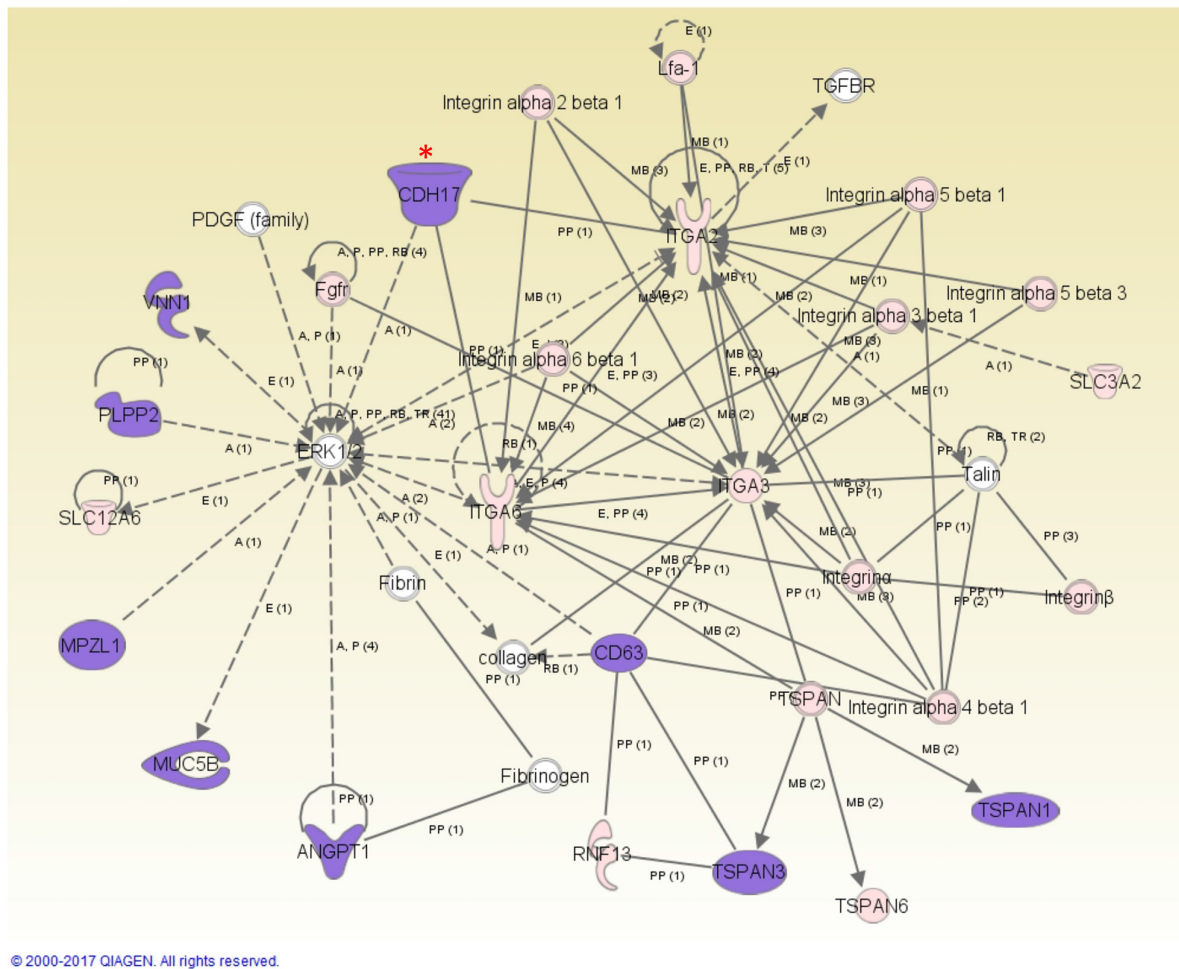

**Supplementary Figure 6: IPA® analysis reveals tumor metastasis as one of top N-glycosylated protein networks activated in tumor parenchyma.** Molecule selected for orthogonal cross-validation (i.e., CDH17) is marked with red asterisk.

### Peptide Summary

Sequence: ITDSEDKALMNGSESR, M10-Oxidation (15.99492 Da), N11-Asn->Asp (0.98402 Da)  
Charge: +3, Monoisotopic m/z: 590.60046 Da (+0.32 mmu/+0.53 ppm), MH+: 1769.78684 Da, RT: 23.00 min,  
Identified with: Sequest HT (v1.3); XCorr:5.35, Ions matched by search engine: 0/0  
Fragment match tolerance used for search: 0.6 Da  
Fragments used for search: b; b-H<sub>2</sub>O; b-NH<sub>3</sub>; y; y-H<sub>2</sub>O; y-NH<sub>3</sub>

Protein references (1):

### Fragment Matches

### Fragment Spectrum

Extracted from: D:\JB\Tissues\Mouse\_JB\Mouse\_A549\_Tumors\01\_TTVJB\_Elite\_MouseA549T\_MEMgly102715\_G06.raw #2337 RT: 23.00  
ITMS, CID@35.00, z=+3, Mono m/z=590.60046 Da, MH+=1769.78684 Da, Match Tol=0.6 Da

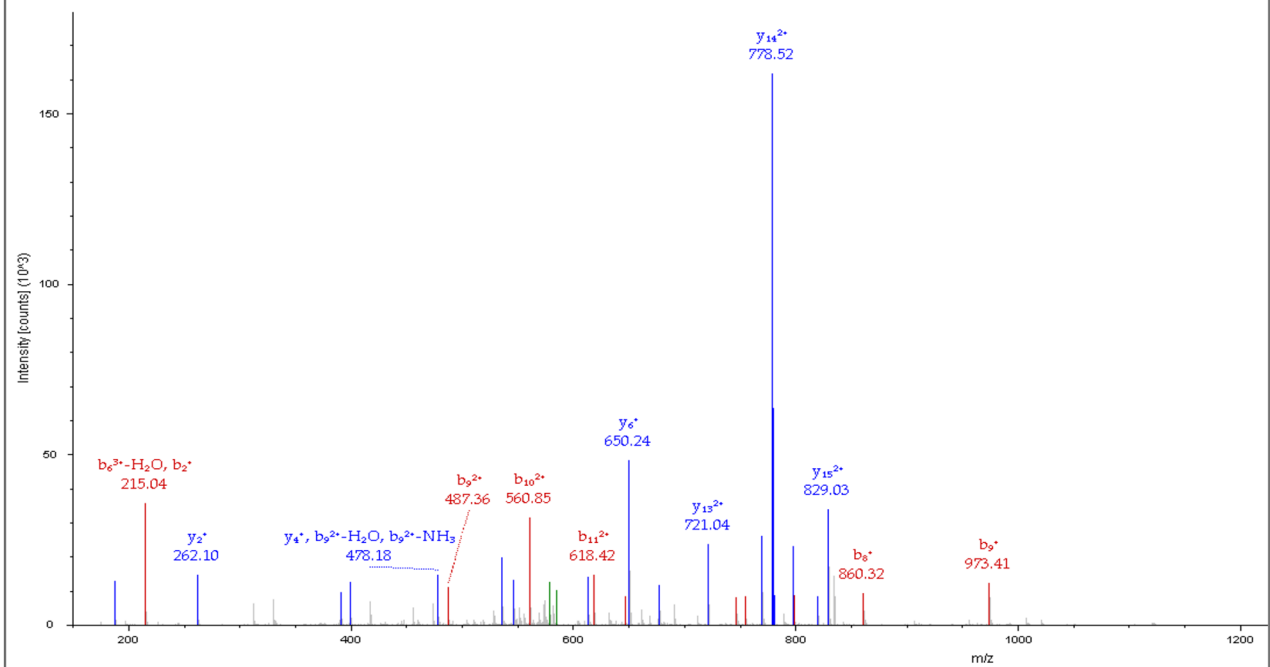

**Supplementary Figure 7: MS<sup>2</sup> spectrum depicting unambiguous identification of the human-parenchymal CD147 ortholog in tumor tissue by detection of protein- and species-specific N-glycopeptide.**

### Peptide Summary

Sequence: ILLTCSLNDSATEVTGHR, C5-Carbamidomethyl (57.02146 Da), N8-Asn->Asp (0.98402 Da)  
Charge: +3, Monoisotopic m/z: 663.33038 Da (+0.4 mmu/+0.6 ppm), MH+: 1987.97660 Da, RT: 47.19 min,  
Identified with: Sequest HT (v1.3); XCorr:3.61, Ions matched by search engine: 0/0  
Fragment match tolerance used for search: 0.6 Da  
Fragments used for search: b; b-H<sub>2</sub>O; b-NH<sub>3</sub>; y; y-H<sub>2</sub>O; y-NH<sub>3</sub>

Protein references (1):

### Fragment Matches

### Fragment Spectrum

Extracted from: D:\JB\Tissues\Mouse\_JB\Mouse\_A549\_Tumors\01\_TTVJB\_Elite\_MouseA549T\_MEMgly102715\_G03.raw #5443 RT: 47.19  
ITMS, CID@35.00, z=+3, Mono m/z=663.33038 Da, MH+=1987.97660 Da, Match Tol.=0.6 Da

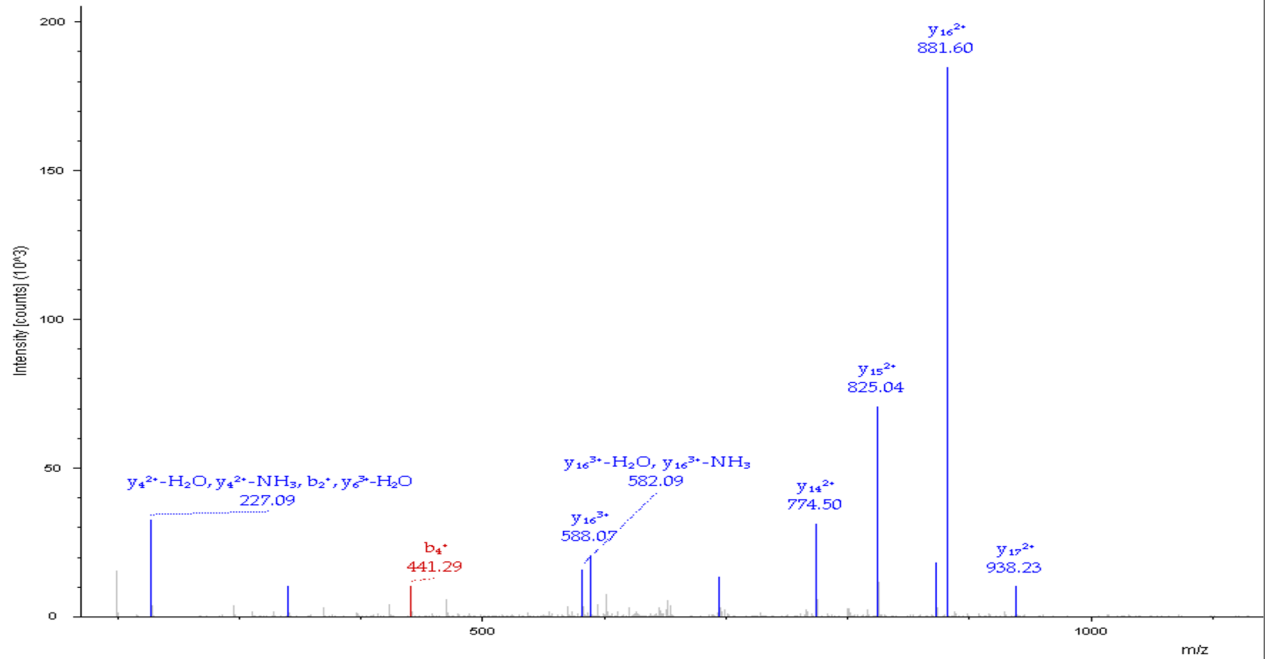

**Supplementary Figure 8: MS<sup>2</sup> spectrum depicting unambiguous identification of the human-parenchymal CD147 ortholog in tumor tissue by detection of protein- and species-specific N-glycopeptide.**

|                   |                                                         |
|-------------------|---------------------------------------------------------|
| P18572            | BASI_MOUSE - <b>Basigin</b> <i>Mus musculus</i> (Mouse) |
| E-value: 0.0      |                                                         |
| Score: 1377       |                                                         |
| Ident.: 65.0%     |                                                         |
| Positives : 80.5% |                                                         |
| Query Length: 385 |                                                         |
| Match Length: 389 |                                                         |

|        |            |     |                                                                         |     |
|--------|------------|-----|-------------------------------------------------------------------------|-----|
| P35613 | BASI_HUMAN | 1   | MAAALFVLLGFPALLGTHGASGAAGFVQAPLSQQRWVGGSVLHCEAVGSPVPEIQWVFEG            | 60  |
| P18572 | BASI_MOUSE | 1   | MAAALLLALAFLLSQQGACAAAGFLKAPLSQERWAGGSVVLHCEAVGSPVPEIQWVFEG             | 60  |
| P35613 | BASI_HUMAN | 61  | QGPNDTCSQLWDGARLDRVHIHATYHQHAASTISIDTLVEEDTGTIECRASNDPDRNHLLT           | 120 |
| P18572 | BASI_MOUSE | 61  | NAPNDSCSQLWDGARLDRVHIHAAAYRQHAASSLSVDGLTAEDTGTIECRASSDPDRNHLLT          | 120 |
| P35613 | BASI_HUMAN | 121 | RAPRVKVVRAQAVVLEPGTVFTTVEDELGSKILL <u>TCSLNDSATEVTGHRWLKGGVVLKE</u>     | 180 |
| P18572 | BASI_MOUSE | 121 | RPPRVKVVRAQASVVLEPGTIQTSVQEVNSKTQLTCSLN <u>SSGVDIVGHRWMRGGKVLQE</u>     | 180 |
| P35613 | BASI_HUMAN | 181 | DALPGQKTEFKVSDDDQWGEYSCVFLPEPMGTANIQLHGPPRVKAVKSSSEHINEGETAML           | 240 |
| P18572 | BASI_MOUSE | 181 | DTLPDLHTKYIVDADDRSGEYSCIFLPEFVGRSEINVEGPPRIKVGKKSEHSSEGLAKL             | 240 |
| P35613 | BASI_HUMAN | 241 | VCKSE-SVPPVTDWAWYK <u>ITDS-EDKALMNGSES--</u> RFFVSSSQGRSELHIENLNMEADP   | 296 |
| P18572 | BASI_MOUSE | 241 | VCKSDASYPPITDWFVKTSDTGEEEAIT <u>NSTEANGKYVVVSTPEKSQLTISNLNVNVD</u>      | 300 |
| P35613 | BASI_HUMAN | 297 | GQYRC <u>NGTSSKGS</u> DQAIITLVRVSHLALWPFGLGIVAEVVLVVTIIFIYKRRRKPEDVLD   | 356 |
| P18572 | BASI_MOUSE | 301 | <u>GTYYVCNATNAQGT</u> TRETISLRVRSRMAALWPFGLGIVAEVVLVVTIIFIYKRRRKPQTLTLD | 360 |
| P35613 | BASI_HUMAN | 357 | DDDAGSAPLKSSGQHQNDRKGNVRQRNNS                                           | 385 |
| P18572 | BASI_MOUSE | 361 | EDDEPGAAPLKSGSGTHMNDKDKNVRQRNAT                                         | 389 |

**Supplementary Figure 9: BLAST analysis confirming protein and species specificity of identified N-glycopeptides from CD147 orthologs.** Underlined in red are human-specific peptides identified in tumor parenchyma. Underlined in green are human-specific peptides identified in 2D-grown A549 cells. Underlined in blue is mouse-specific N-glycopeptide identified in normal mouse lungs. NxST motif is highlighted in red.

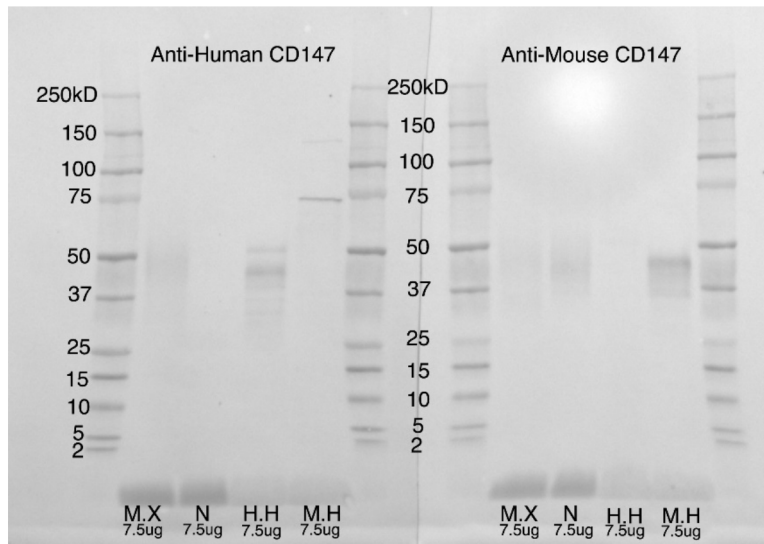

**Supplementary Figure 10: WB analysis of tumor tissue homogenate.** Using anti-human CD147 antibody the WB analysis verified expression of human-derived CD147 in tumor homogenate (MX) and human heart (HH) homogenate (i.e., positive control). The WB analysis using the same antibody was negative in normal (N) mouse lungs and mouse heart (MH) used as negative control.

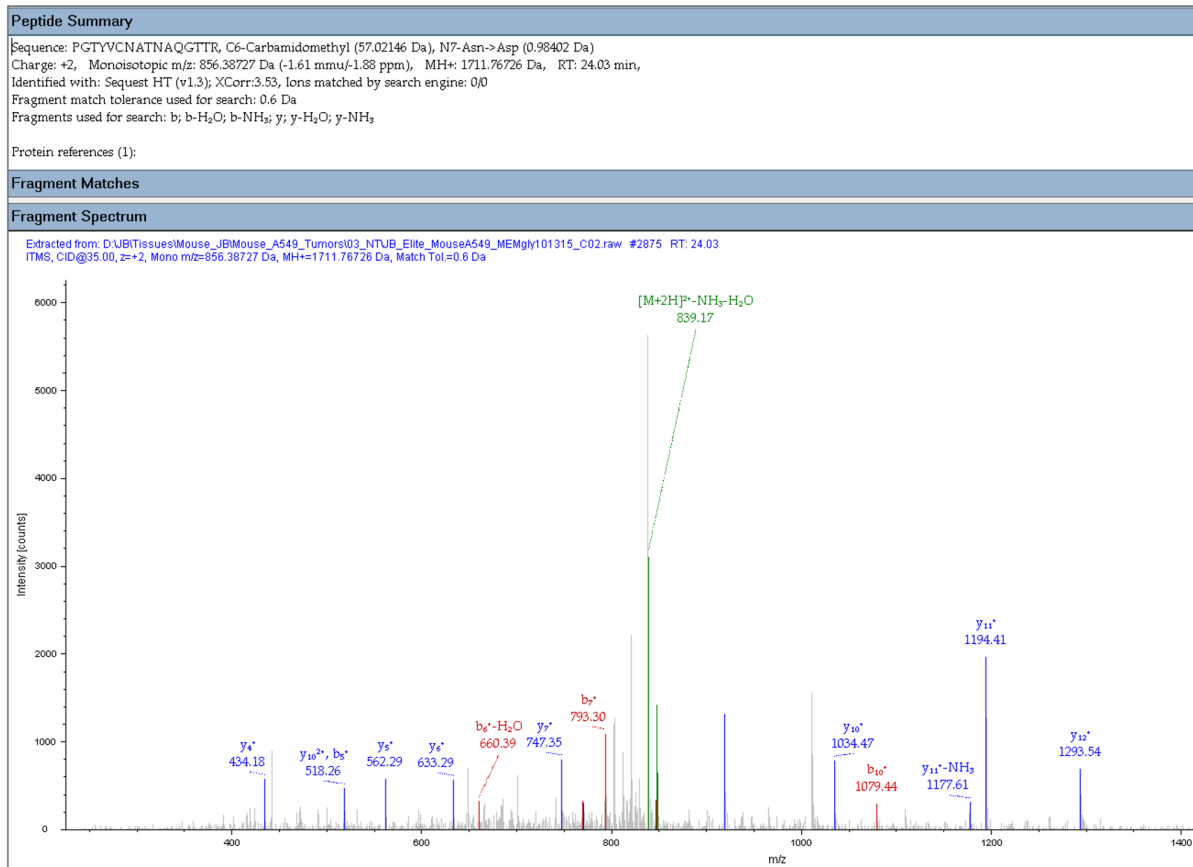

**Supplementary Figure 11: MS<sup>2</sup> spectrum depicting unambiguous identification of the mouse CD147 ortholog in normal lungs by detection of protein- and species-specific N-glycopeptide.**

### Peptide Summary

Sequence: TDSEDKALMNGSESR, M9-Oxidation (15.99492 Da), N10-Asn->Asp (0.98402 Da)  
Charge: +2, Monoisotopic m/z: 828.85632 Da (+1.77 mmu/+2.14 ppm), MH+: 1656.70537 Da, RT: 20.35 min,  
Identified with: Sequest HT (v1.3); XCorr:4.03, Ions matched by search engine: 0/0  
Fragment match tolerance used for search: 0.6 Da  
Fragments used for search: b; b-H<sub>2</sub>O; b-NH<sub>3</sub>; y; y-H<sub>2</sub>O; y-NH<sub>3</sub>

Protein references (1):

### Fragment Matches

### Fragment Spectrum

Extracted from: D:\JB\Tissues\Mouse\_JB\Mouse\_A549\_Tumors\04\_A549-CLJB\_Elite\_A549\_MEMgly012315\_C05.raw #3183 RT: 20.35  
ITMS, CID@35.00, z=+2, Mono m/z=828.85632 Da, MH+=1656.70537 Da, Match Tol.=0.6 Da

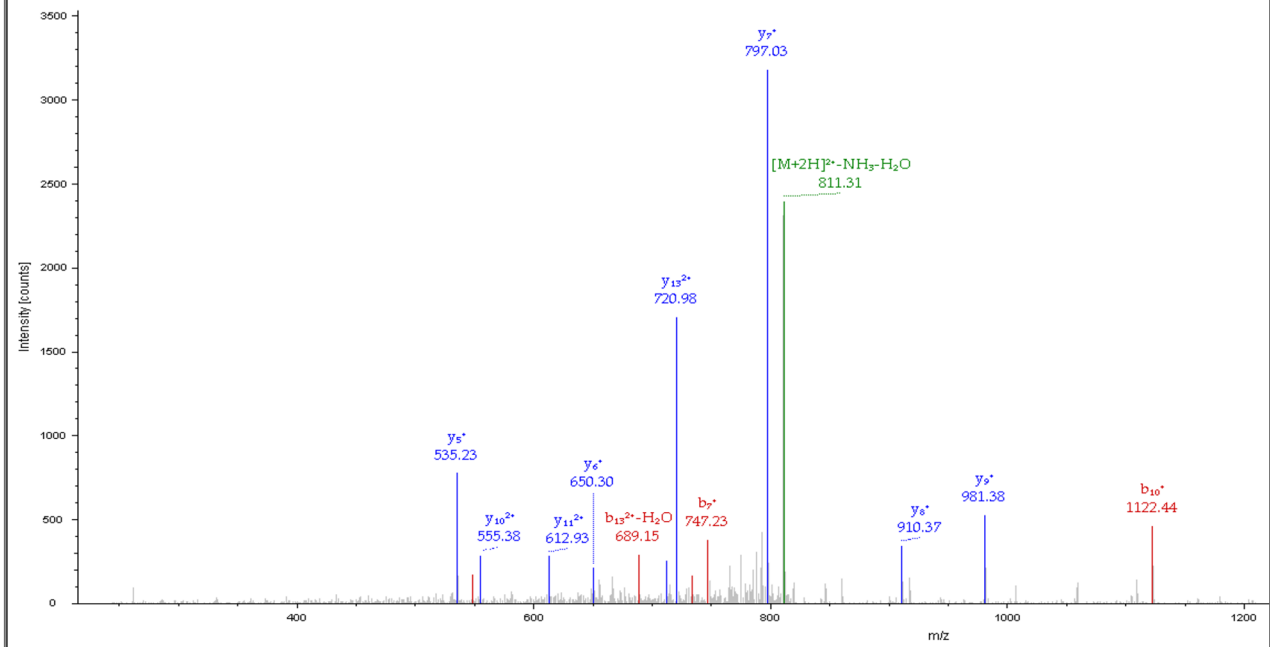

**Supplementary Figure 12: MS<sup>2</sup> spectrum depicting unambiguous identification of the human CD147 ortholog in 2D-grown A549 cells by detection of protein- and species-specific N-glycopeptide.**

### Peptide Summary

Sequence: LTCSLNDSTAEVTGHR, C3-Carbamidomethyl (57.02146 Da), N6-Asn->Asp (0.98402 Da)  
Charge: +2, Monoisotopic m/z: 881.40747 Da (+0.2 mmu/+0.22 ppm), MH+: 1761.80766 Da, RT: 44.74 min,  
Identified with: Sequest HT (v1.3); XCorr: 4.99, Ions matched by search engine: 0/0  
Fragment match tolerance used for search: 0.6 Da  
Fragments used for search: b; b-H<sub>2</sub>O; b-NH<sub>2</sub>; y; y-H<sub>2</sub>O; y-NH<sub>2</sub>

Protein references (1):

### Fragment Matches

### Fragment Spectrum

Extracted from: D:\JBITissues\Mouse\_JB\Mouse\_A549\_Tumors\04\_A549-CLUB\_Elite\_A549\_MEMgly012315\_C04.raw #8133 RT: 44.74  
ITMS, CID@35.00, z=+2, Mono m/z=881.40747 Da, MH+=1761.80766 Da, Match Tol=0.6 Da

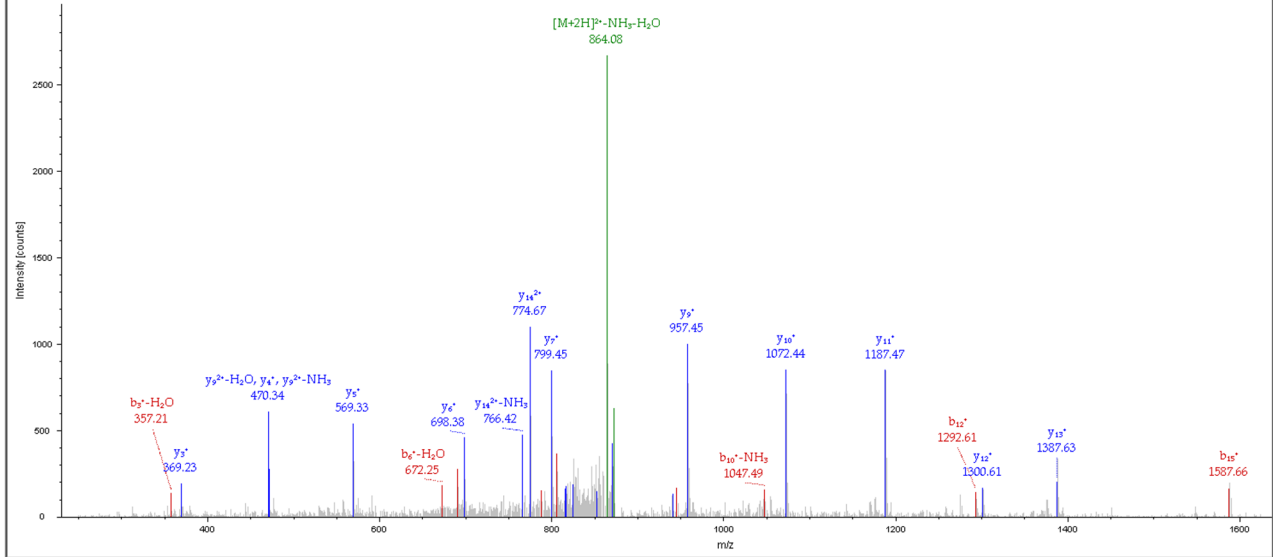

**Supplementary Figure 13: MS<sup>2</sup> spectrum depicting unambiguous identification of the human CD147 ortholog in 2D-grown A549 cells by detection of protein- and species-specific N-glycopeptide.**



|                   |                                                |                                                          |
|-------------------|------------------------------------------------|----------------------------------------------------------|
| <b>G3QVG0</b>     | <b>G3QVG0_GORGO - Basigin (Ok blood group)</b> | <b>Gorilla gorilla gorilla (Western lowland gorilla)</b> |
| E-value: 0.0      |                                                |                                                          |
| Score: 1965       |                                                |                                                          |
| Ident.: 96.6%     |                                                |                                                          |
| Positives: 98.2%  |                                                |                                                          |
| Query Length: 385 |                                                |                                                          |
| Match Length: 386 |                                                |                                                          |

|               |                     |     |                                                                |     |
|---------------|---------------------|-----|----------------------------------------------------------------|-----|
| <b>P35613</b> | <b>BASI_HUMAN</b>   | 1   | MAAALFVLLGFALLGTHGASGAAGFVQAPLSQQRWVGGSVELHCEAVGSPVPEIQWWFEG   | 60  |
| <b>G3QVG0</b> | <b>G3QVG0_GORGO</b> | 1   | MAAALFVLLGFALLGTHGASGAAGFVQAPLSQQRWVGGSVELHCEAVGSPVPEIQWWFEG   | 60  |
| <b>P35613</b> | <b>BASI_HUMAN</b>   | 61  | QGPNDTCSQLWDGARLDRVHIHATYHQHAASTISIDTLVEEDTGTYECRASNDPDRNHLT   | 120 |
| <b>G3QVG0</b> | <b>G3QVG0_GORGO</b> | 61  | QGPNDTCSQLWDGARLDRVHIHATYHQHAASTISIDTLVEEDTGTYECRASNDPDRNHLT   | 120 |
| <b>P35613</b> | <b>BASI_HUMAN</b>   | 121 | RAPRVKVVRAQAVVLVLEPGTVFTTVEDLGSKILLTCSLNDSATEVTGHRWLKGGVVLKE   | 180 |
| <b>G3QVG0</b> | <b>G3QVG0_GORGO</b> | 121 | RAPRVKVVRAQAVVLVLEPGTV TTVE+LGSKILLTCSLNDSATEVTGHRWLKGGVVLKE   | 180 |
| <b>P35613</b> | <b>BASI_HUMAN</b>   | 181 | DALPGQKTEFKVDSDDQWGEYSCVFLPEPMGTANIQL-HGPPRVKAVKSEHINEGETAM    | 239 |
| <b>G3QVG0</b> | <b>G3QVG0_GORGO</b> | 181 | DALPGQKTEF+VDSDDQWGEYSCVFLPEPMGTANI+L HGPPRVKAVK SEHINEGETA+   | 240 |
| <b>P35613</b> | <b>BASI_HUMAN</b>   | 240 | LVCKSESVPPVTDWAWYKITDSEDKALMNGSES RFFVSSSQGRSELHIENLNMEADPGQY  | 299 |
| <b>G3QVG0</b> | <b>G3QVG0_GORGO</b> | 241 | LACKSESVPPVTDWAWYKITDSDGKALTNNGSES RFFVSSSQGRSELYIENLNMEADPGQY | 300 |
| <b>P35613</b> | <b>BASI_HUMAN</b>   | 300 | RCNGTSSKGSQAIITLVRSHLAALWPF LGIVAEVVLVTIIFIYEKRRKPEDVLDLDDDD   | 359 |
| <b>G3QVG0</b> | <b>G3QVG0_GORGO</b> | 301 | RCNGTSSKGSQAVITLVRSHLAALWPF LGIVAEVVLVTIIFIYEKRRKPEDVLDLDDDD   | 360 |
| <b>P35613</b> | <b>BASI_HUMAN</b>   | 360 | AGSAPLKSSGQHNDKGNVQRNNS                                        | 385 |
| <b>G3QVG0</b> | <b>G3QVG0_GORGO</b> | 361 | AGSAPLKSSGQHNDKGNVQRNNS                                        | 386 |

**Supplementary Figure 14: BLAST analysis depicting comparison of human's and gorilla's CD147 orthologs.** Highlighted in red are predicted N-glycosylated sites showing protein and species-specific AA sequence differences of MS-identifiable N-glycopeptides.

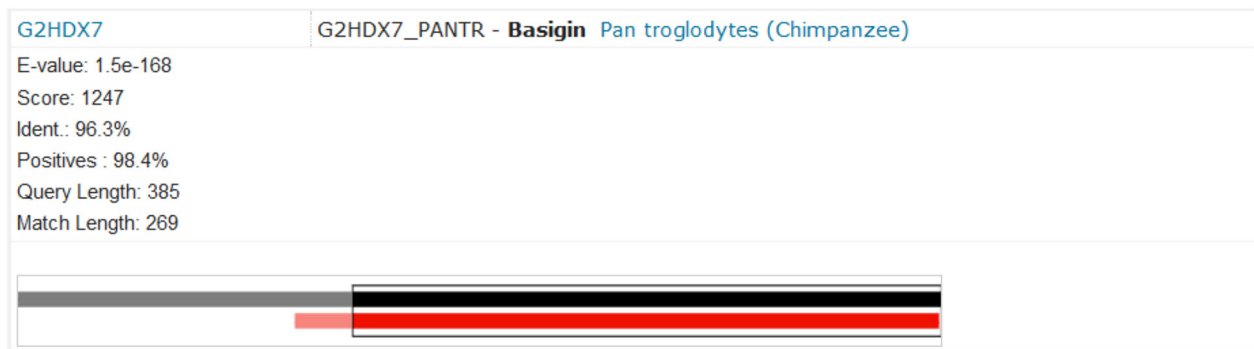

|               |                     |     |                                                                                     |     |
|---------------|---------------------|-----|-------------------------------------------------------------------------------------|-----|
| <b>P35613</b> | <b>BASI_HUMAN</b>   | 140 | GTVF <del>TT</del> VEDLGSKILLTCSL <b>ND</b> SATEVTTGHRWLKGGVVLKEDALPGQKTEFKVDSDDQWG | 199 |
| <b>G2HDX7</b> | <b>G2HDX7_PANTR</b> | 24  | GTVF <del>TT</del> VEDLGSKILLTC + <b>ND</b> SATEVTTGHRWLKGGVVL+EDALPGQKTEFKVDSDDQWG | 83  |
| <b>P35613</b> | <b>BASI_HUMAN</b>   | 200 | EYSCVFLPEPMGTANIQLHGPPRVKAVKSSEHINEGETAMLVCKSESVPVTDWAWYKIT                         | 259 |
| <b>G2HDX7</b> | <b>G2HDX7_PANTR</b> | 84  | EYSCVFLPEPMGTANIQLHGPPRVKAVKSSEHINEGETA+LVCKSESVPVTDWAWYKIT                         | 143 |
| <b>P35613</b> | <b>BASI_HUMAN</b>   | 260 | DSEDKAL <b>MNG</b> SESRRFFVSSSQGRSELHIENLNMEADPGQYRC <b>NG</b> TSSKGSQDAIITLVRV     | 319 |
| <b>G2HDX7</b> | <b>G2HDX7_PANTR</b> | 144 | DS DKAL <b>MNG</b> SESRRFFVSS QGRSELHIENLNMEADPGQYRC <b>NG</b> SS+GSDQA+ITLVRV      | 203 |
| <b>P35613</b> | <b>BASI_HUMAN</b>   | 320 | SHLAALWPFPGIVAEVLVLTIIIFIYKRRKPEDVLDDDDAGSAPLKSSGQHQNDKGNV                          | 379 |
| <b>G2HDX7</b> | <b>G2HDX7_PANTR</b> | 204 | SHLAALWPFPGIVAEVLVLTIIIFIYKRRKPEDVLDDDDAGSAPLKSSGQHQNDKGNV                          | 263 |
| <b>P35613</b> | <b>BASI_HUMAN</b>   | 380 | RQRNSS                                                                              | 385 |
| <b>G2HDX7</b> | <b>G2HDX7_PANTR</b> | 264 | RQRNSS                                                                              | 269 |

**Supplementary Figure 15: BLAST analysis depicting comparison of human's and chimpanzee's CD147 orthologs.** Highlighted in red are predicted N-glycosylated sites showing protein and species-specific AA sequence differences of MS-identifiable N-glycopeptides.

### Peptide Summary

Sequence: ALSIGFETCR, Charge: +2, Monoisotopic m/z: 548.77563 Da (-0.81 mmu/-1.48 ppm), MH+: 1096.54399 Da, RT: 44.84 min,  
Identified with: Sequest HT (v1.3); XCorr:3.44, Ions matched by search engine: 0/0  
Fragment match tolerance used for search: 0.6 Da  
Fragments used for search: b; b-H<sub>2</sub>O; y; y-H<sub>2</sub>O; y-NH<sub>2</sub>

### Protein references (1):

- CD44 antigen OS=Homo sapiens GN=CD44 PE=1 SV=3 - [CD44\_HUMAN]

### Fragment Matches

### Fragment Spectrum

Extracted from: D:\BMTissues\Mouse\_JBIMouse\_A549\_Tumors\01\_TTUB\_Elite\_MouseA549T\_MEMgly102715\_G01.raw #5150 RT: 44.84  
ITMS, CID@35.00, z=+2, Mono m/z=548.77563 Da, MH+=1096.54399 Da, Match Tol=0.6 Da

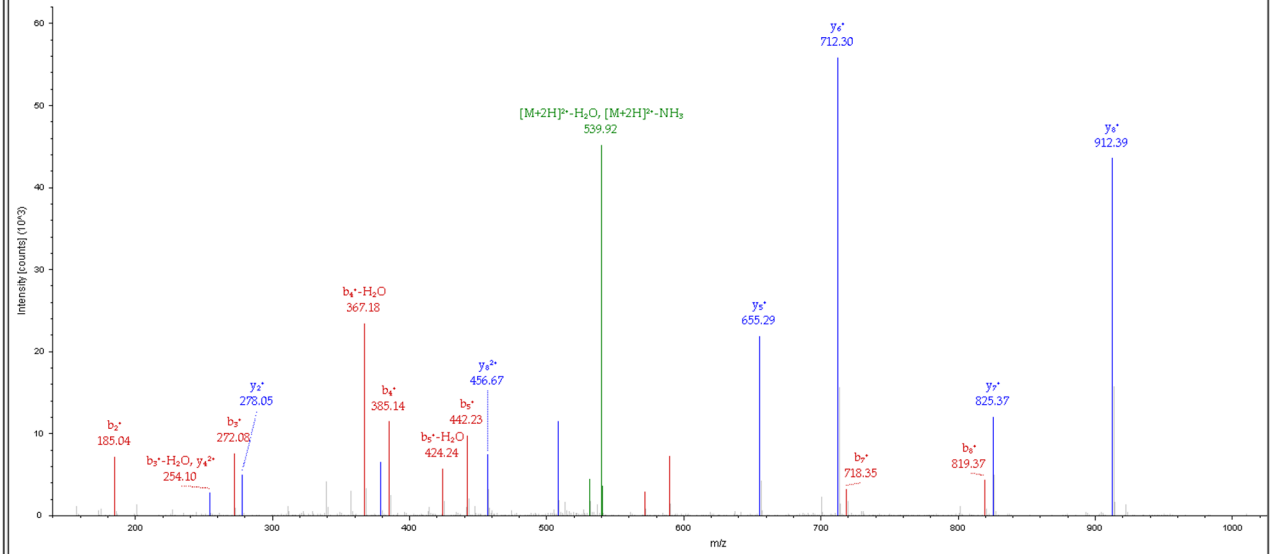

Supplementary Figure 16: MS<sup>2</sup> spectrum depicting unambiguous identification of the human-derived CD44 ortholog in tumor parenchyma by detection of protein- and species-specific N-glycopeptide.

### Peptide Summary

Sequence: AFNSTLPTMAQMEK, N3-Asn->Asp (0.98402 Da), M9-Oxidation (15.99492 Da), M12-Oxidation (15.99492 Da)  
Charge: +2, Monoisotopic m/z: 801.36249 Da (-0.48 mmu/-0.6 ppm), MH+: 1601.71770 Da, RT: 32.24 min,  
Identified with: Sequest HT (v1.3); XCorr: 4.18, Ions matched by search engine: 0/0  
Fragment match tolerance used for search: 0.6 Da  
Fragments used for search: b; b-H<sub>2</sub>O; b-NH<sub>3</sub>; y; y-H<sub>2</sub>O; y-NH<sub>3</sub>

Protein references (1):

### Fragment Matches

### Fragment Spectrum

Extracted from: D:\BITissues\Mouse\_JB\Mouse\_A549\_Tumors\01\_TTUB\_Elite\_MouseA549T\_MEMgly102715\_D05.raw #3552 RT: 32.24  
ITMS, CID@35.00, z=+2, Mono m/z=801.36249 Da, MH+=1601.71770 Da, Match Tol=0.6 Da

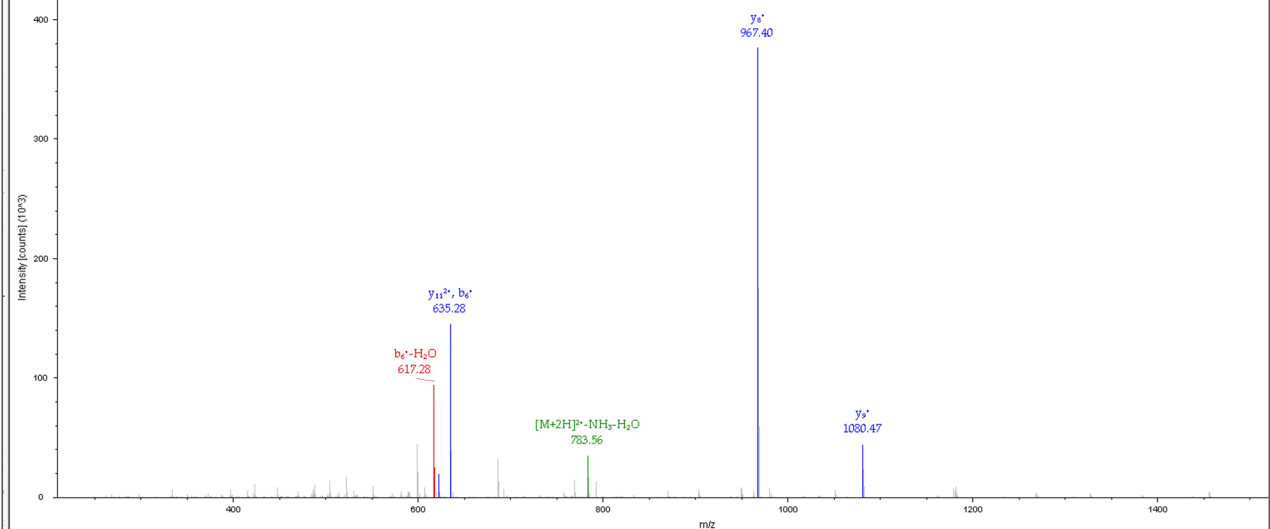

**Supplementary Figure 17: MS<sup>2</sup> spectrum depicting unambiguous identification of the human-derived CD44 ortholog in tumor parenchyma by detection of protein- and species-specific N-glycopeptide.**

P15379

CD44\_MOUSE - **CD44 antigen** *Mus musculus* (Mouse)

E-value: 0.0

Score: 2582

Ident.: 67.2%

Positives : 75.0%

Query Length: 742

Match Length: 778

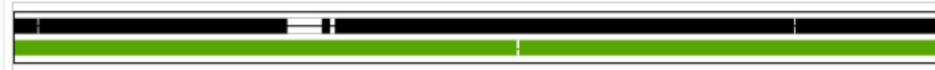

|        |            |     |                                                                    |     |
|--------|------------|-----|--------------------------------------------------------------------|-----|
| P16070 | CD44_HUMAN | 1   | MDKFWHHAAWGLCLVPLSLA--QIDLNITCRFAGVFHVEKNGRYSISRTEAADLCKAFNS       | 58  |
|        |            |     | MDKFWWH AWGLCL+ LSLA QIDLN+TCR+AGVFHVEKNGRYSISRTEAADLC+AFNS        |     |
| P15379 | CD44_MOUSE | 1   | MDKFWHTAWGLCLLQLSLAHQQIDLNVTCRYAGVFHVEKNGRYSISRTEAADLCQAFNS        | 60  |
| P16070 | CD44_HUMAN | 59  | <u>TLPTMAQMEKALSIGFETCRYGFIEGHVVIPRIHPNSICAAANNTGVYIL-TSNTSQYD</u> | 117 |
|        |            |     | <u>TLPTM QM+ ALS GFETCRYGFIEG+VVIPRIHPN+ICAAAN+TGVYIL TSNTS YD</u> |     |
| P15379 | CD44_MOUSE | 61  | TLPTMDQMKLALSKGFETCRYGFIEGNVVIPRIHPNAICAAANHTGVYILVTSNTSHYD        | 120 |
| P16070 | CD44_HUMAN | 118 | CFNASAPPEEDCTSVTDLPNAFDGPITITIVNRDGTTRYVQKGEYRTNPEDIYPSNPTDDD      | 177 |
|        |            |     | CFNASAPPEEDCTSVTDLPN+FDGP+TITIVNRDGTTRY +KGEYRT+ EDI SN DDD        |     |
| P15379 | CD44_MOUSE | 121 | CFNASAPPEEDCTSVTDLPNSFDGPVTITIVNRDGTTRYKKGGEYRTHQEDIDASNIIDDD      | 180 |
| P16070 | CD44_HUMAN | 178 | VSSGSSSSRSSTGGYIFYTF-STVHPIPDEDSPWITDSTDRIPTLLMS-----              | 226 |
|        |            |     | VSSGS+ E+S T GYI +T+ T P D+D + ST A+T+ S                           |     |
| P15379 | CD44_MOUSE | 181 | VSSGSTIEKS-TPEGYILHTYLPTEQPTGDQDSSFIRSTLATIASTVHSHKSHAAAQKQN       | 239 |
| P16070 | CD44_HUMAN | 227 | -----TSATAT-----ETATKRQETWDFSWLFLPSESKNHLHT                        | 261 |
|        |            |     | TSAT ET KRQE +WFSWLF PSESK+HLHT                                    |     |
| P15379 | CD44_MOUSE | 240 | NWIWSWFGNSQSTTQTQEPTTSATTALMTTPETPPKRQEAQNWFSWLFQSESKSHLHT         | 299 |
| P16070 | CD44_HUMAN | 262 | TQMAGTSSNTISAGWEPNEENEDERDRHLSFSGSGIDDEDFFISSTISTTPRAFDHTKQN       | 321 |
|        |            |     | T+M GT SNT GWEPNEENEDE D + SFSGSGIDDEDFFISSTI+TTPR T+ N            |     |
| P15379 | CD44_MOUSE | 300 | TKMPGTESNTNPTGWEPNEENEDETDYPSFSGSGIDDEDFFISSTIATTPRVSARTEDN        | 359 |

**Supplementary Figure 18: BLAST analysis confirming protein and species specificity of identified N-glycopeptides from human-derived CD44.** Underlined in red are protein and species-specific peptides identified solely in tumor parenchyma.

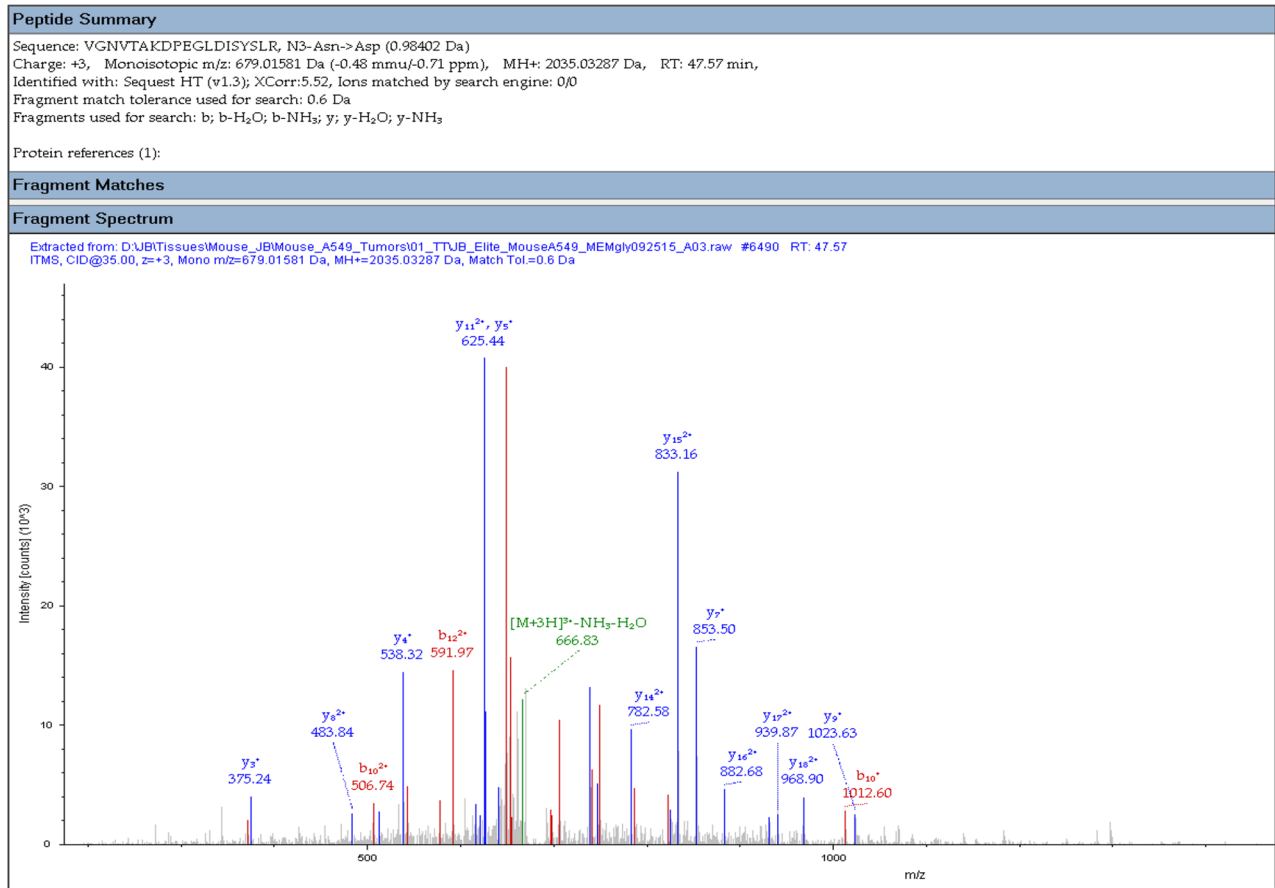

**Supplementary Figure 19: MS<sup>2</sup> spectrum depicting unambiguous identification of the human-derived CDH17 ortholog in tumor parenchyma by detection of protein- and species-specific N-glycopeptide.**

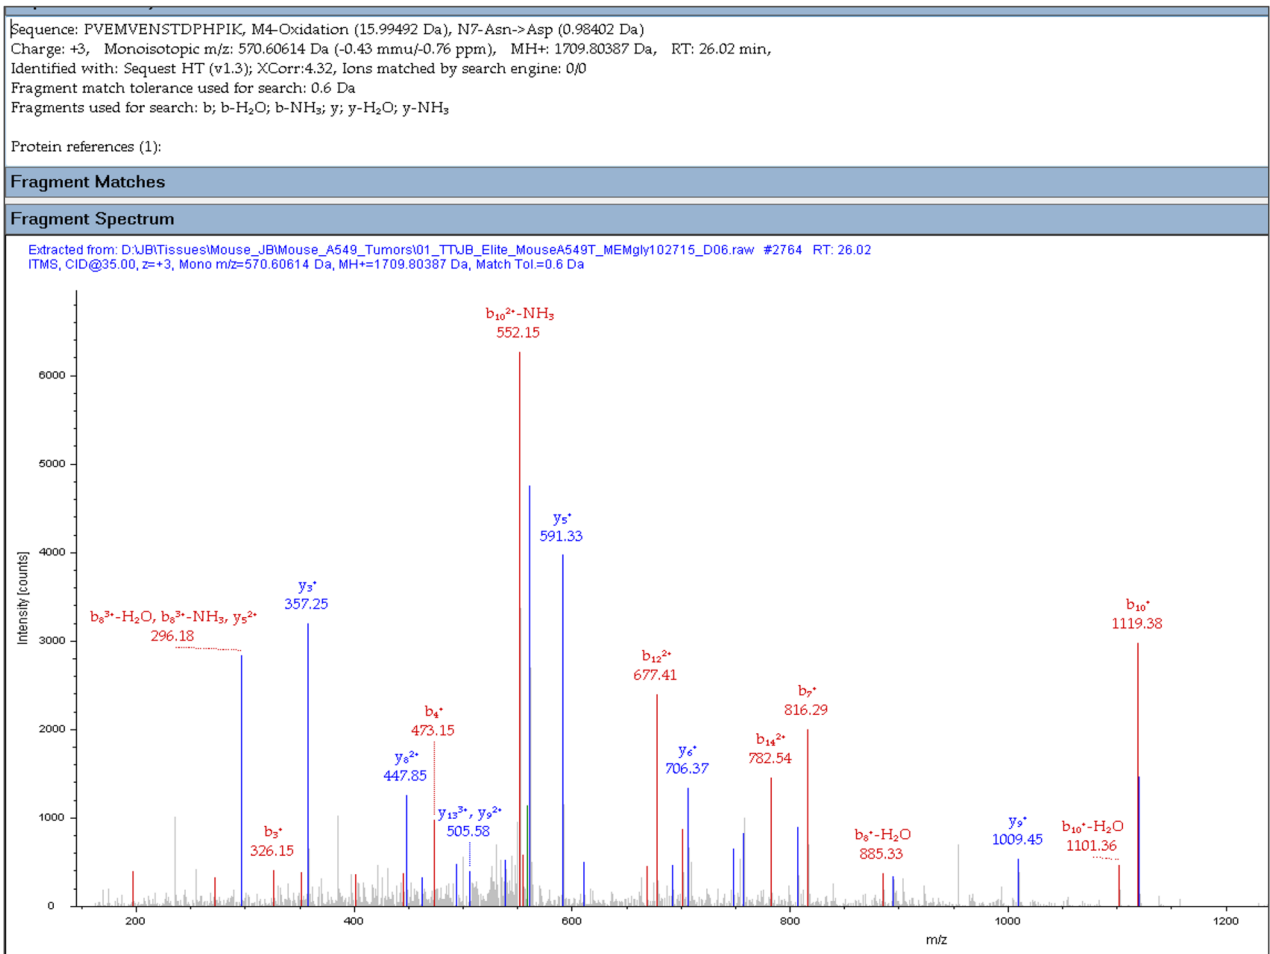

**Supplementary Figure 20: MS<sup>2</sup> spectrum depicting unambiguous identification of the human-derived CDH17 ortholog in tumor parenchyma by detection of protein- and species-specific N-glycopeptide.**



| Q9R100            |             | CAD17_MOUSE - Cadherin-17 Mus musculus (Mouse) |                                                                                    |
|-------------------|-------------|------------------------------------------------|------------------------------------------------------------------------------------|
| E-value: 0.0      |             |                                                |                                                                                    |
| Score: 3443       |             |                                                |                                                                                    |
| Ident.: 79.1%     |             |                                                |                                                                                    |
| Positives : 88.2% |             |                                                |                                                                                    |
| Query Length: 832 |             |                                                |                                                                                    |
| Match Length: 827 |             |                                                |                                                                                    |
|                   |             |                                                |                                                                                    |
| Q12864            | CAD17_HUMAN | 2                                              | ILQAHLHSLCLLMLYLATGYGQEGKFGSGPLKPMTFISIYEGQEPSQIIFQFKANPPAVTFF 61                  |
| Q9R100            | CAD17_MOUSE | 1                                              | ++ A LH LCLL LYL GYG+EGKFGSGPLKPMTFISI+EGQEPSQ+IFQFK NPPAVTFF 60                   |
| Q12864            | CAD17_HUMAN | 62                                             | LTGETDNI FVIERE <u>GLLYN</u> RALDRETRSTHNLQVAALDANGIIVEGVPVITIKVKDIND 121          |
| Q9R100            | CAD17_MOUSE | 61                                             | LTGETD IF IE++GLLY+ RALDRETR+ H+LQ+AAALD++G IV+GVPVITII+VKDIND 120                 |
| Q12864            | CAD17_HUMAN | 122                                            | NRPTFLQSKYEGSVRQNSRPGKPFYVNVATDLDDPATPNGQLYYQIVIQIPMINNVMYFQ 181                   |
| Q9R100            | CAD17_MOUSE | 121                                            | NRPTFLQSKYEGSVRQNSRPGKPFYVNVATDLDDPATPNGQL+YQIVIQIP IN+VMYFQ 180                   |
| Q12864            | CAD17_HUMAN | 182                                            | INNKTGAISLTREGSQELNPAKNPSYNLVISVKDMGGQSENSFSDDTTSVDIIVTENIWK <u>A</u> 241          |
| Q9R100            | CAD17_MOUSE | 181                                            | I++KTGAISLT EGSQEL+P KNPSYNLV+SVKDMGGQSENSFSDDTT VDI + ENIWK <u>A</u> 240          |
| Q12864            | CAD17_HUMAN | 242                                            | <u>PKPVEMVENSTDPHP</u> IKITQVRWNDPGAQYSLVDKEKLPRFPFSIDQEGDIYVTQPLDRE 301           |
| Q9R100            | CAD17_MOUSE | 241                                            | PEPVEIRENSTDPHPIKITQVQWNDPGAQYSLVNKEKLSFPFPFSIDQEGNIYVTQALDRE 300                  |
| Q12864            | CAD17_HUMAN | 302                                            | EKDAYVVFYAVAKDEYGKPLSYPLEIHVKVKDINDNPPTCPSPVTVFEVQENERLGNISIGT 361                 |
| Q9R100            | CAD17_MOUSE | 301                                            | EKNSHVVFATAKDENGKPLAYPLEIYVKVIDINDNPPTCLSPVTVFEVQENEPLGNISIGI 360                  |
| Q12864            | CAD17_HUMAN | 362                                            | LTADRDEENTANSFLNYRIVEQTPKLPMDFLFIQTYAGMLQLAKQSLKKQDTPQYNLT 421                     |
| Q9R100            | CAD17_MOUSE | 361                                            | AHD DE N NS L Y++V+QTPK+P DGLFLI Y G +QL+KQSLKKQD+PQYNL+ 420                       |
| Q12864            | CAD17_HUMAN | 422                                            | IEVSDKDFKTLCFVQINVIDINDQIPIFEKSDYGNLTLAEDTNIGSTILTIQATDADEPF 481                   |
| Q9R100            | CAD17_MOUSE | 421                                            | IEVSD DFKTLC++Q+NVIDINDQIPIFE S+YG+ TL+EDT IGSTIL IQATDADEPF 480                   |
| Q12864            | CAD17_HUMAN | 482                                            | TGSSKILYHIKGDSEGRGLVDTDPHTNTGYVIIKKPLDFETAAVSNIVFKAENPEPLVF 541                    |
| Q9R100            | CAD17_MOUSE | 481                                            | TGSSKILYI++GD+EGRL V TDP TN GYV IKKPLDFET VS+IVF+AENPEPLV 540                      |
| Q12864            | CAD17_HUMAN | 542                                            | GVKY <u>NASSFAK</u> FTLIVTDVNEAPQFSQHVVFQAKVSEDVAIGTKV <u>GNVTAKDPEGLDISYS</u> 601 |
| Q9R100            | CAD17_MOUSE | 541                                            | G++YNASSFA F LIVTDVNE P F Q +FQA VSED A+G++VGNVTA+DPEGL +SYS 600                   |
| Q12864            | CAD17_HUMAN | 602                                            | <u>LRG</u> DTRGWLKIDHVTGEIFSVAPLDREAGSPYRVQVVATEVGGSSLSVSEFHLILMDVN 661            |
| Q9R100            | CAD17_MOUSE | 601                                            | L+G+ RGWLKID VTGEIFS APLDRE S YRVQVVATEVGGSSLS ++FHL+L DVN 660                     |

Supplementary Figure 21: BLAST analysis confirming protein and species specificity of identified N-glycopeptides from parenchymal human-derived CDH17. Underlined in red are protein and species-specific peptides identified in tumor parenchyma.



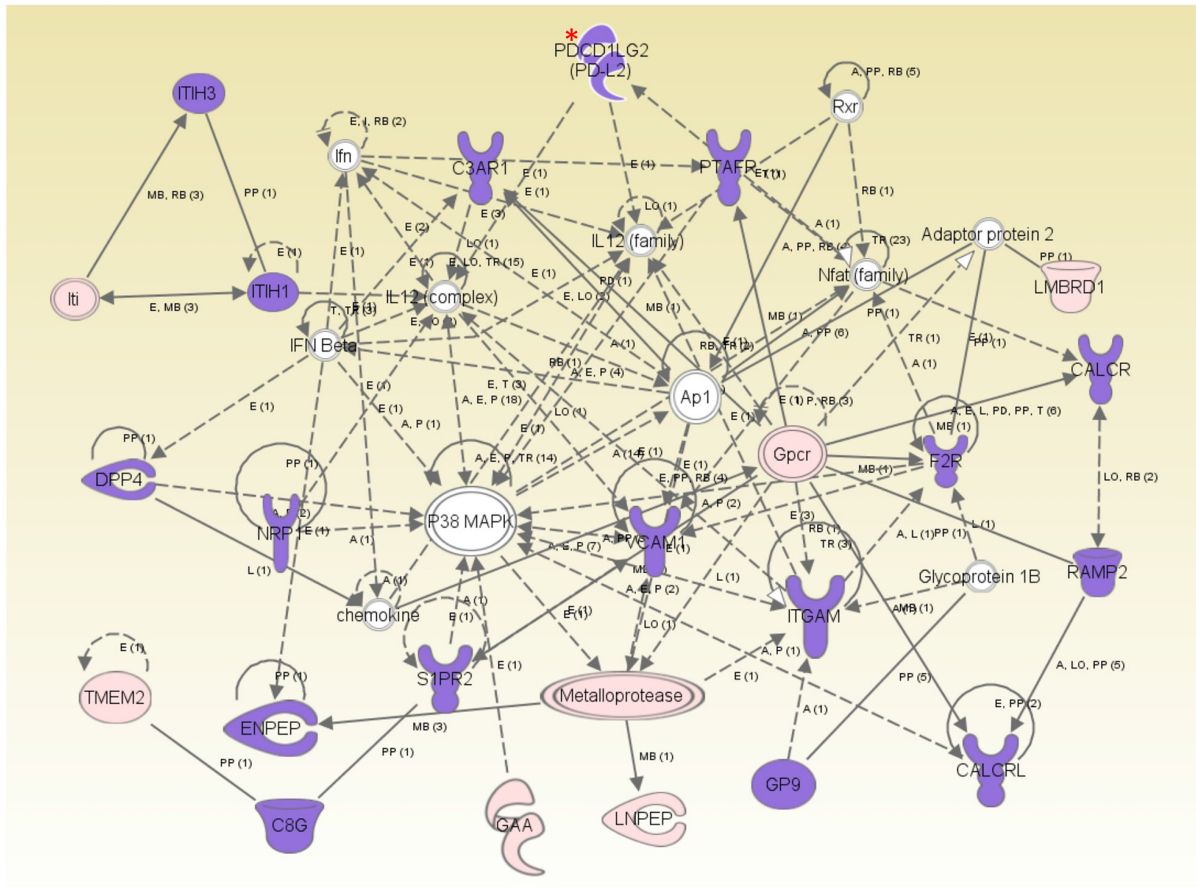

© 2000-2017 QIAGEN. All rights reserved.

**Supplementary Figure 22: IPA<sup>®</sup> analysis reveals leukocyte immune response as one of top N-glycosylated protein networks activated in tumor stroma.** Molecule selected for orthogonal cross-validation (i.e., PD-L2) is marked with red asterisk.

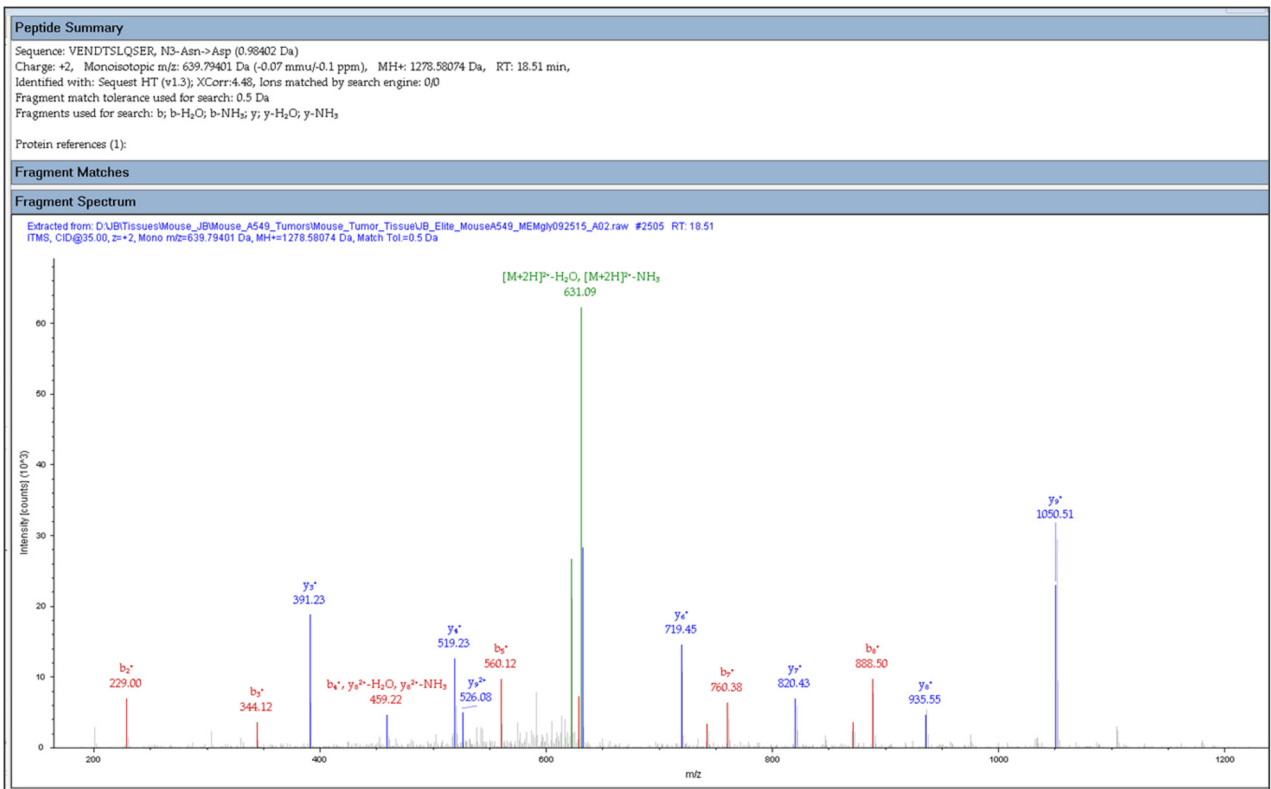

**Supplementary Figure 23: MS<sup>2</sup> spectrum depicting unambiguous identification of the mouse-derived PD-L2 ortholog in tumor stroma by detection of protein- and species-specific N-glycopeptide.**

Q9BQ51 PD1L2\_HUMAN - Programmed cell death 1 ligand 2 Homo sapiens (Human)

E-value: 2.2e-117  
 Score: 895  
 Ident.: 69.6%  
 Positives : 80.6%  
 Query Length: 247  
 Match Length: 273

Identification of the mouse Programmed cell death 1 ligand 2 (Pcd1lg2) only in tumor stroma (i.e. highlighted in blue) by 36 PSMs from species and protein specific glyco-peptide

|        |             |     |                                                                     |     |
|--------|-------------|-----|---------------------------------------------------------------------|-----|
| Q9WUL5 | PD1L2_MOUSE | 1   | MLLLLPILNLSLQLHPVAALFTVTAPKEVYTVDVGSSVSLECFDRRECTELEGIRASLQ         | 60  |
|        |             |     | M+ LL +L+L LQLH +AALFTVT PKE+Y ++ GS+V+LEC+FD L I ASLQ              |     |
| Q9BQ51 | PD1L2_HUMAN | 1   | MIFLLMLLSLELQLHQIAALFTVTVPKELYIIIEHGSNVTLECNFDTGSHVNLGAITASLQ       | 60  |
| Q9WUL5 | PD1L2_MOUSE | 61  | <u>KVENDTSLQSERATLLEEQLPLGKALFHIPSVQVRDSGQYRCLVICGAAWDYKYLTVKVK</u> | 120 |
|        |             |     | KVENDTS ERATLLEEQLPLGKA FHIP VQVRD GQY+C++I G AWDYKYLTVKVK          |     |
| Q9BQ51 | PD1L2_HUMAN | 61  | KVENDTSPHRERATLLEEQLPLGKASFHIPQVQVRDEGQYQCIIYGVAWDYKYLTVKVK         | 120 |
| Q9WUL5 | PD1L2_MOUSE | 121 | ASYMRIDTRILEVPGTGEVQLTCQARGYPLAEVSWQNVSVPANTSHIRTEPEGLYQVTSVL       | 180 |
|        |             |     | ASY +I+T IL+VP T EV+LTCQA GYPLAEVSW NVSVPANTSH RTPEGLYQVTSVL        |     |
| Q9BQ51 | PD1L2_HUMAN | 121 | ASYRKINTHILKVPETDEVELTCQATGYPLAEVSWPNVSVPANTSHSRTPEGLYQVTSVL        | 180 |
| Q9WUL5 | PD1L2_MOUSE | 181 | RLKPQPSRNFSCMFWNAHMKELTSALIDPLSRMEPKVPRTWPLHVFIPACTIALIFLAIV        | 240 |
|        |             |     | RLKP P RNFSC+FWN H++ELT A ID S+MEP+ TW LH+FIP C IA IF+A V           |     |
| Q9BQ51 | PD1L2_HUMAN | 181 | RLKPPPGRNFSCVFWNTHVRELTLASIDLQSQMEPRTHPTWLLHIFIPFCIIAFIFIATV        | 240 |
| Q9WUL5 | PD1L2_MOUSE | 241 | IIQRKRI                                                             | 247 |
|        |             |     | I RK++                                                              |     |
| Q9BQ51 | PD1L2_HUMAN | 241 | IALRKQL                                                             | 247 |

**Supplementary Figure 24: BLAST analysis confirming protein and species specificity of identified N-glycopeptides from stromal mouse-derived PD-L2, Pcd1lg2 gene product.** Underlined in blue is protein and species-specific peptides identified solely in tumor stroma.

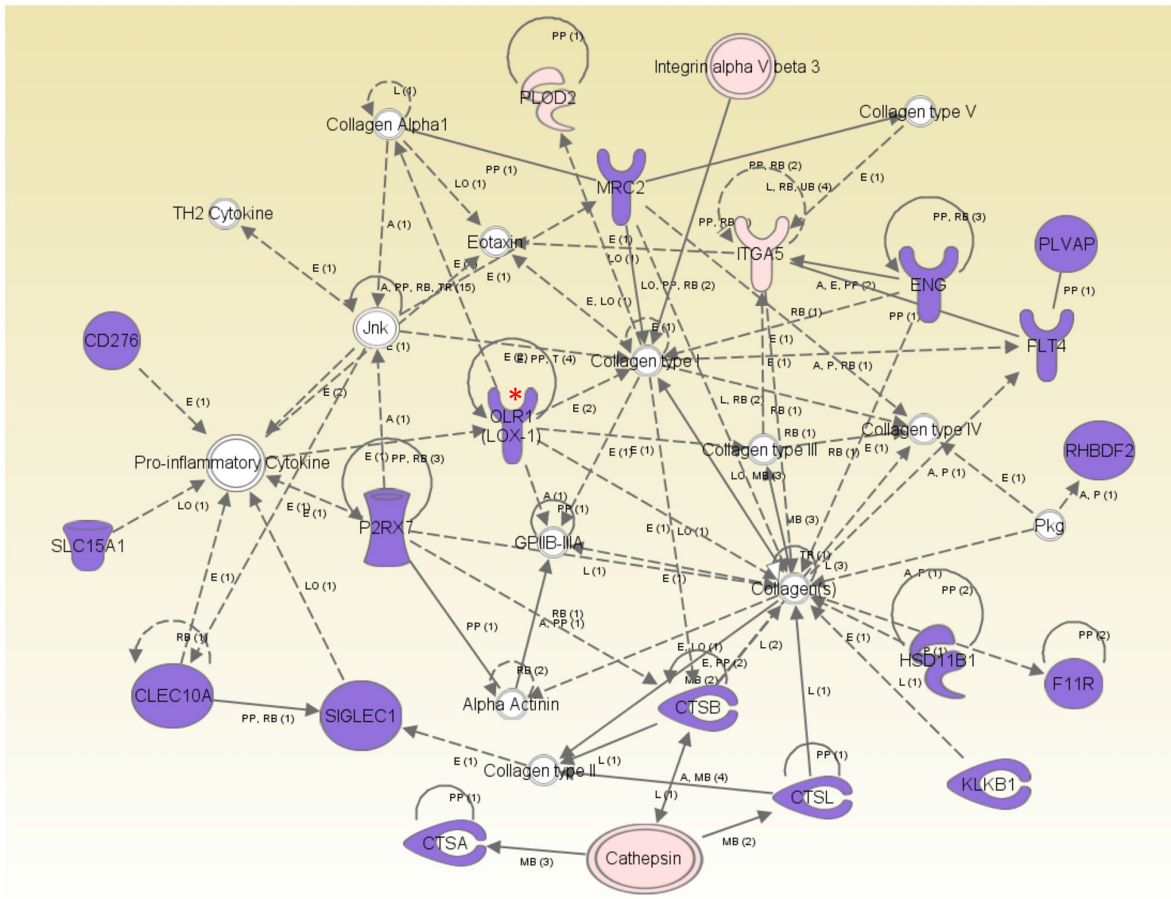

© 2000-2017 QIAGEN. All rights reserved.

**Supplementary Figure 25: IPA® analysis reveals leukocyte migration as one of top N-glycosylated protein networks activated in tumor stroma. Molecule selected for orthogonal cross-validation (i.e., LOX-1) is marked with red asterisk.**

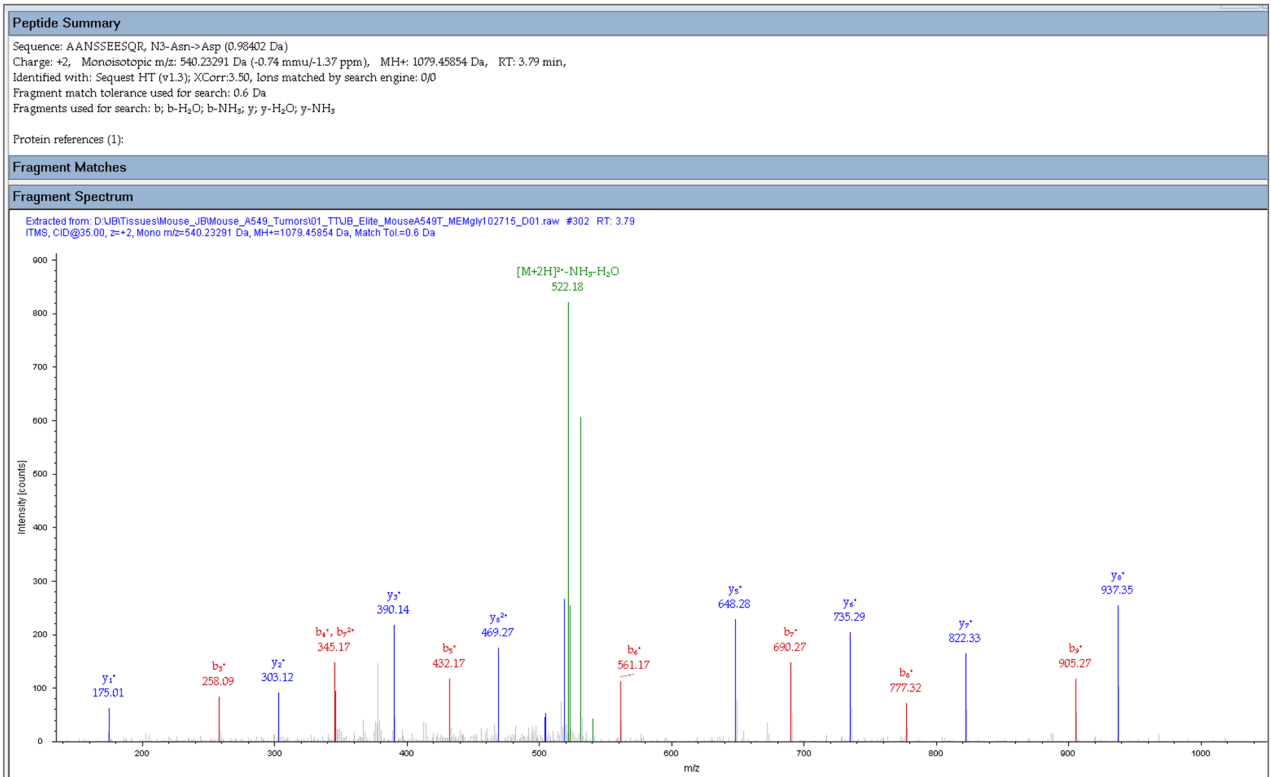

**Supplementary Figure 26: MS<sup>2</sup> spectrum depicting unambiguous identification of the mouse-derived LOX-1 ortholog in tumor stroma by detection of protein- and species-specific N-glycopeptide.**

P78380

OLR1\_HUMAN - Oxidized low-density lipoprotein receptor 1 Homo sapiens (Human)

E-value: 2.2e-87

Score: 707

Ident.: 44.9%

Positives : 54.6%

Query Length: 363

Match Length: 273

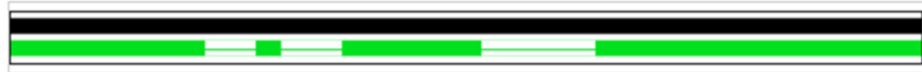

|        |            |     |                                                               |     |
|--------|------------|-----|---------------------------------------------------------------|-----|
| Q9EQ09 | OLR1_MOUSE | 1   | MTFDD-KMKPANDEPDQKSCGKKPKGLHLSSPWWFPAAMTLVILCLVLSVTLIVQWTQL   | 59  |
|        |            |     | MTFDD K++ D+PD+KS GKK KGL L SPWW AA TL +LCL L VT++V QL        |     |
| P78380 | OLR1_HUMAN | 1   | MTFDDLKIQTVKDQPDEKSNKKKAKGLQFLYSPWWCLAAATLGVLCGLVVTIMVLGMQL   | 60  |
| Q9EQ09 | OLR1_MOUSE | 60  | RQVSDLLKQYQANLTQQDRILEGQMLAQQAENTSQESKKEKLGKIDTLTQKLNEKSKEQ   | 119 |
|        |            |     | QVSDLL Q QANLT Q KK+L+G+I                                     |     |
| P78380 | OLR1_HUMAN | 61  | SQVSDLLTQEQLNLTHTQ-----KKELEGQIS-----                         | 86  |
| Q9EQ09 | OLR1_MOUSE | 120 | EELLQKNQNLQEALQRAANSSEESQRELKGGKIDITRKLDEKSKEQEELLQMIQNLQEAL  | 179 |
|        |            |     | A Q+A +S+ES+ ELK I+T+ RKL+EKSKEQ EL NLQE L                    |     |
| P78380 | OLR1_HUMAN | 87  | -----ARQQAEASQSENELKEMIETLARKLNEKSKEQMELHHQNLNLQETL           | 134 |
| Q9EQ09 | OLR1_MOUSE | 180 | QRAANSSEESQRELKGGKIDITLTLKNEKSKEQEELLQKNQNLQEALQRAANFSGPCPDW  | 239 |
|        |            |     | +R AN S PCPDW                                                 |     |
| P78380 | OLR1_HUMAN | 135 | KRVANC-----SAPCPQDW                                           | 148 |
| Q9EQ09 | OLR1_MOUSE | 240 | LWHKENCYLF-HGPFWEKNRQTCQSLGGQLQINGADDLTFILQAISHTTSPFWIGLHR    | 298 |
|        |            |     | +WH ENCYLF G F+WEK+++ C SL +LL+IN DL FI QAIS+++ PFW+GL R      |     |
| P78380 | OLR1_HUMAN | 149 | IWHGENCYLFSSGSFNWEKSQEKCLSLDAKLLKINSTADLDFIQQAISYSSFPFWMGLSR  | 208 |
| Q9EQ09 | OLR1_MOUSE | 299 | KKPGQPWLWENGTPLNQFFFKTRGVSLQLYSSGNCAYLQDGAVFAENCILIAFSICQKKT  | 358 |
|        |            |     | + P PWLWE+G+PL F+ RG Q Y SG CAY+Q GAV+AENCIL AFSICQKK         |     |
| P78380 | OLR1_HUMAN | 209 | RNPSYPWLWEDGSPLMPHLFRVIRGAVSQTYPSGTCAYIQRGAVYAENCILAAFSICQKKA | 268 |

**Supplementary Figure 27: BLAST analysis confirming protein and species specificity of identified N-glycopeptides from stromal mouse-derived LOX-1, Olr1 gene product.** Underlined in blue is protein and species-specific peptides identified solely in tumor stroma.

Network Analysis: Humoral Immune Response

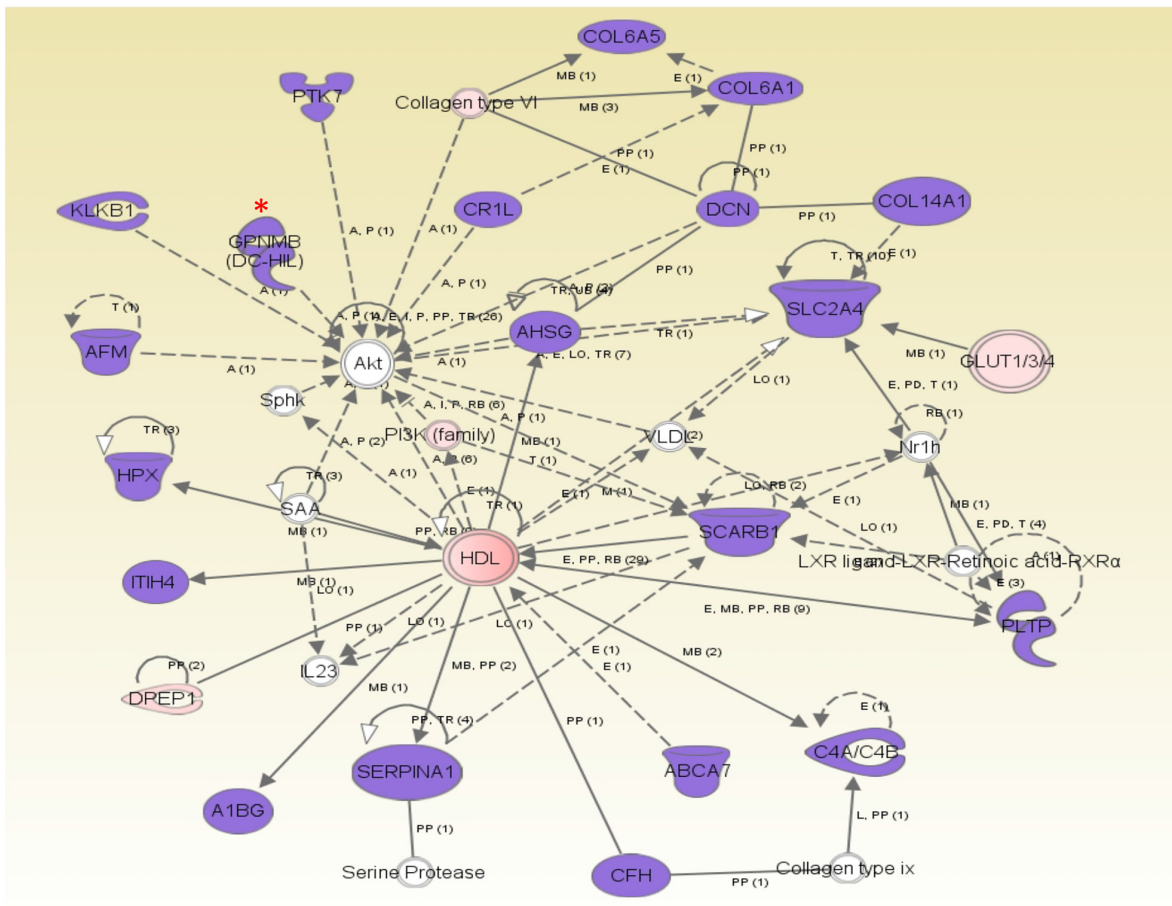

© 2000-2017 QIAGEN. All rights reserved.

**Supplementary Figure 28: IPA® analysis reveals humoral immune response as one of top N-glycosylated protein networks activated in tumor stroma.** Molecule selected for orthogonal cross-validation (i.e., DC-HIL) is marked with red asterisk.



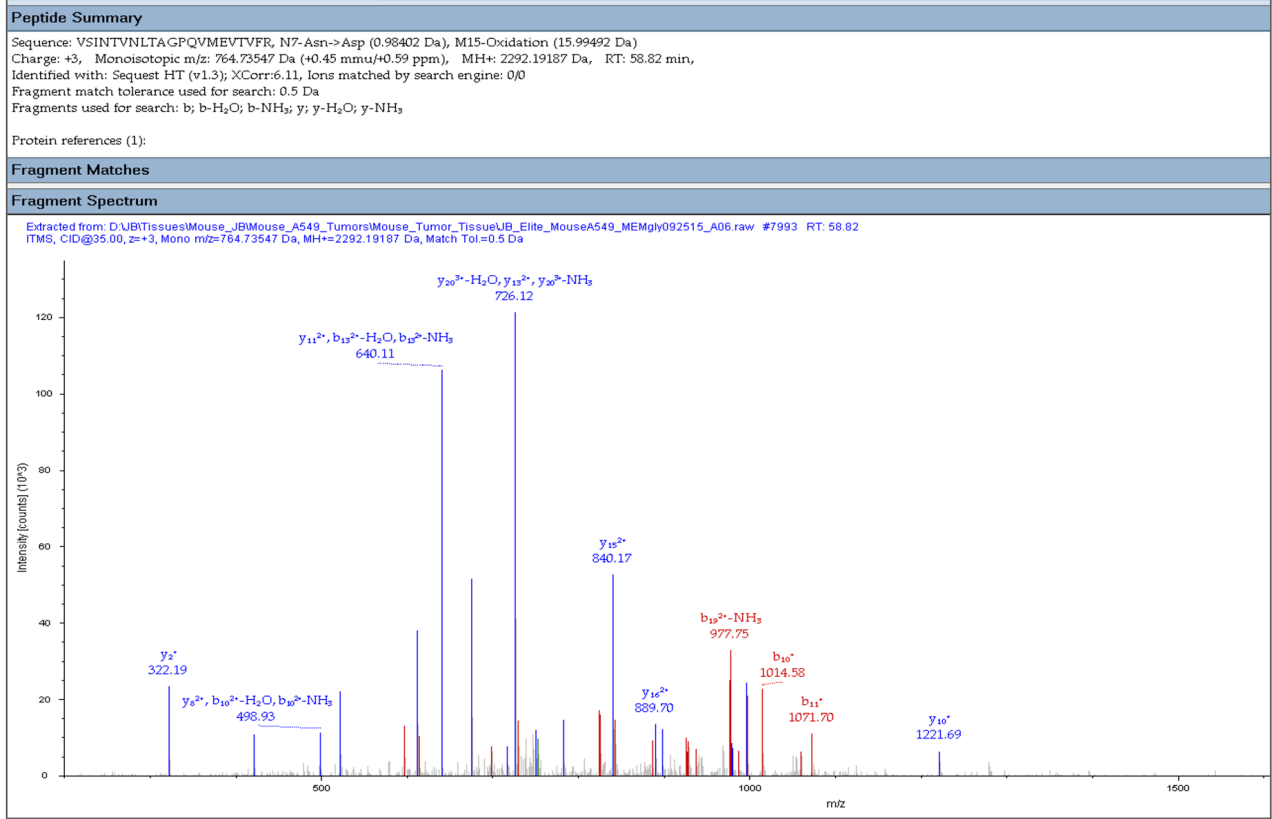

**Supplementary Figure 29: MS<sup>2</sup> spectrum depicting unambiguous identification of the mouse-derived DC-HIL ortholog (i.e., Gpnmb gene product) in tumor stroma by detection of protein- and species-specific N-glycopeptide.**



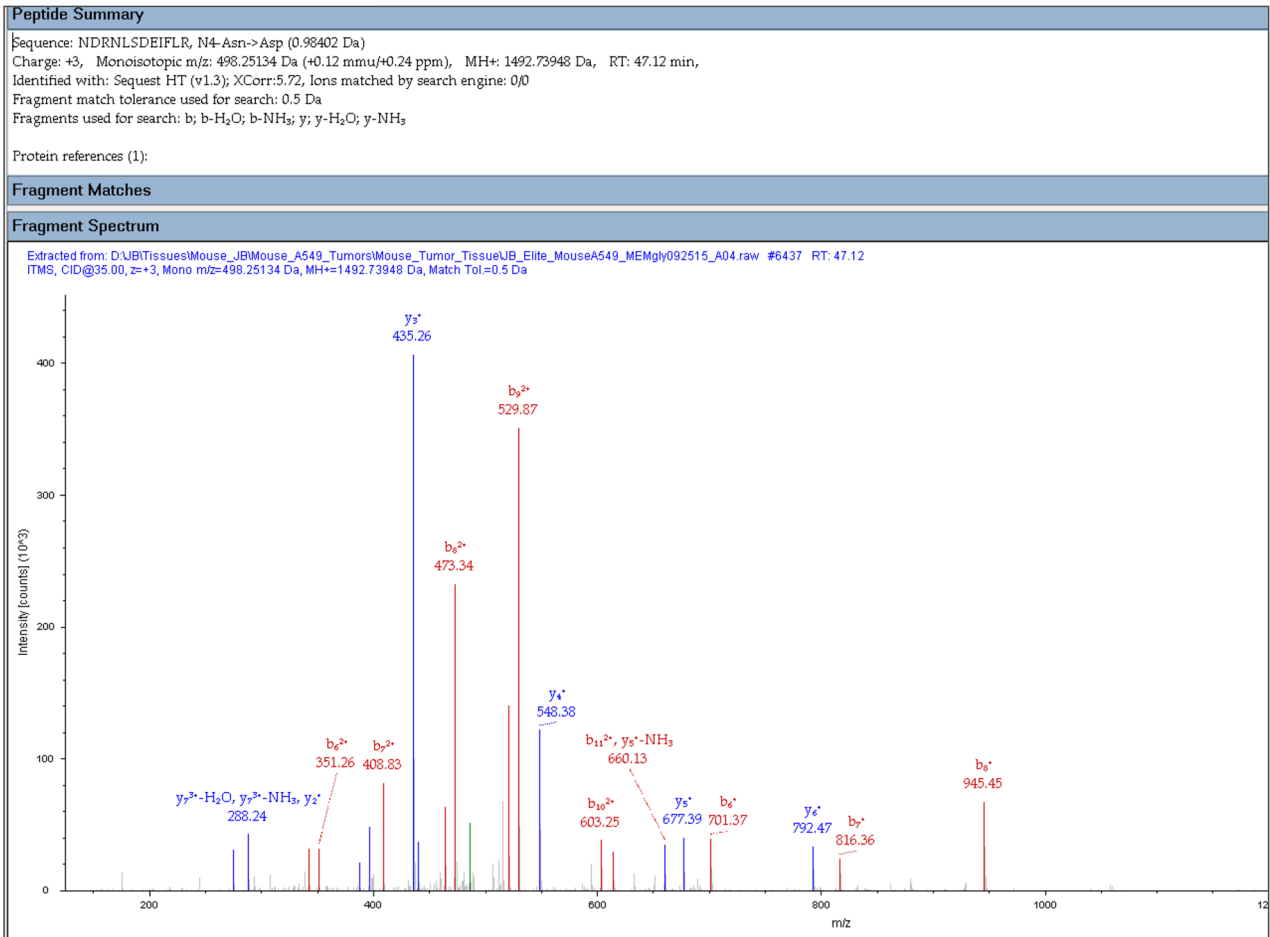

**Supplementary Figure 30: MS<sup>2</sup> spectrum depicting unambiguous identification of the mouse-derived DC-HIL ortholog (i.e., Gpnmb gene product) in tumor stroma by detection of protein- and species-specific N-glycopeptide.**

| Query ID | Species     | Position | Sequence                                                                | Score |
|----------|-------------|----------|-------------------------------------------------------------------------|-------|
| Q99P91   | GPNMB_MOUSE | 1        | MESLCGVLGFLLLAAGLPLQAARFRDVLGHEQYPDHREHNQLRGWSSDENWDEHLYP               | 60    |
| Q14956   | GPNMB_HUMAN | 1        | MECLYYFLGFLLLAARLPLDAAKRFHFDVLGNERPFSAYMREHNQLNGWSSDENWNEKLYP           | 60    |
| Q99P91   | GPNMB_MOUSE | 61       | VWRRGDGRWKDSWEGGRVQAVLTSDSPALVGSNITFVVNLVFPFCQKEDANGNIVYEKNC            | 120   |
| Q14956   | GPNMB_HUMAN | 61       | VWRRGDMRWKNSWKGGRVQAVLTSDSPALVGSNITFAVNLIFPFCQKEDANGNIVYEKNC            | 120   |
| Q99P91   | GPNMB_MOUSE | 121      | RNDLGLTSDLHVNWTAGADDGDWEDGTSRSQHLRFDRRFPFRPHGWKKSFWYVFHTL               | 180   |
| Q14956   | GPNMB_HUMAN | 121      | RNEAGLSADPYVYNWTAWESEDSDGNGTQSHHNVFPDGKFFPHHPGRRWNFIYVFHTL              | 180   |
| Q99P91   | GPNMB_MOUSE | 181      | GQYFQKLGRC SARV <u>SINTVNLTAGPQVMEVTV</u> FRRYGRAYIPISKVKDVYVITDQIPV FV | 240   |
| Q14956   | GPNMB_HUMAN | 181      | GQYFQKLGRC SRVSVNTANVTLGPQLMEVTVYRRHGRAYVPIAQVKDVYVITDQIPV FV           | 240   |
| Q99P91   | GPNMB_MOUSE | 241      | TMSQKNDNRNLSDEIFLRDLPIVFDVLIHDP SHFLNDSAISYKWNFGDNTGLFVSNHTLN           | 300   |
| Q14956   | GPNMB_HUMAN | 241      | TMFQKNDNRN SDETFLKDLPIMFVDVLIHDP SHFLNYSTINYKWSFGDNTGLFVSTNHTVN         | 300   |
| Q99P91   | GPNMB_MOUSE | 301      | HTYVLNGTFNLNLT VQTAVPGPCPPSPSTPPSPSTPPSPSPSPSLPTL-STPSPSLMPTG           | 359   |
| Q14956   | GPNMB_HUMAN | 301      | HTYVLNGTFNLNLT VKAAAPGCPP-----PPPPRPSKPTPSLATTLSKSYDSNTPGPAG            | 355   |
| Q99P91   | GPNMB_MOUSE | 360      | YKSMELSDISNENCRINRYGYFRATIT IVEGILEVSI MQIADVMPPTPQPANSLMDFVT           | 419   |
| Q14956   | GPNMB_HUMAN | 356      | DNPLELSRIPDENCQINRYGHFQATIT IVEGILEVNI IQMTDVLMPVFWPESSLIDFVVT          | 415   |
| Q99P91   | GPNMB_MOUSE | 420      | CKGATPMEACTIISDPTCQIAQNRVCS PVAVDGLCLLSVRRAFNGSGTYCVNFTLGDDAS           | 479   |
| Q14956   | GPNMB_HUMAN | 416      | CQGSIPTEVCTIISDPTCEITQNTVCSPVDVDEMCLLTVRRTFNGSGTYCVNFTLGDDTS            | 475   |
| Q99P91   | GPNMB_MOUSE | 480      | LALTSTLISIPGKDPDSPLRVNGVLISIGCLAVLVTMVTILLYKHKHKAYKPIGNCP RNT           | 539   |
| Q14956   | GPNMB_HUMAN | 476      | LALTSTLISVPRDRPASPLRMANSALISVGLAIFVTVISLLVYKHKHKEYNPIENSPGNV            | 535   |
| Q99P91   | GPNMB_MOUSE | 540      | VKGKGLSVLLSHAKAPFFRGDQEKDPLLQDK                                         | 570   |
| Q14956   | GPNMB_HUMAN | 536      | VRSKGLSVFLNRAKAVFFPGNQEKDPLLKNQ                                         | 566   |

**Supplementary Figure 31: BLAST analysis confirming protein and species specificity of identified N-glycopeptides from stromal mouse-derived DC-HIL, Gpnmb gene product.** Underlined in blue are protein and species-specific peptides identified solely in tumor stroma.

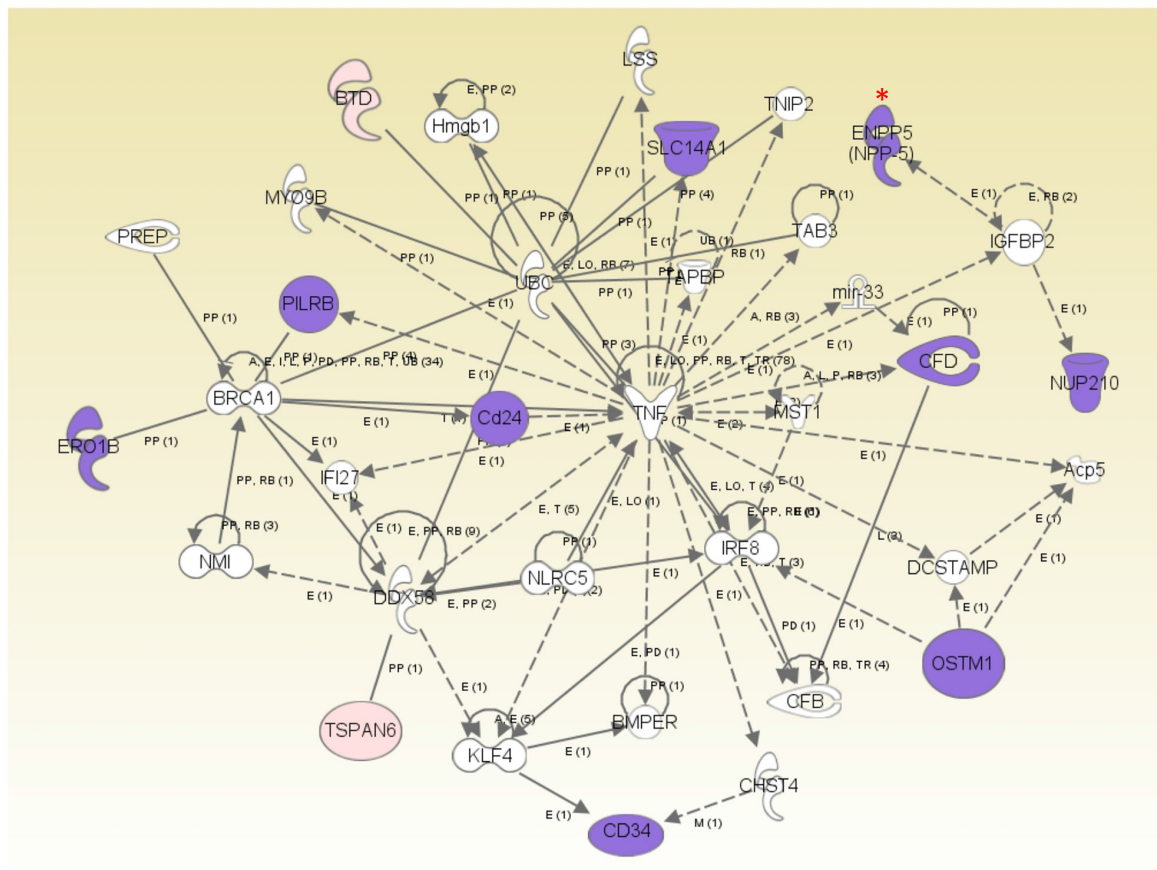

© 2000-2017 QIAGEN. All rights reserved.

**Supplementary Figure 32: IPA<sup>®</sup> analysis reveals humoral immune response as one of top N-glycosylated protein networks activated in tumor stroma. Molecule selected for orthogonal cross-validation (i.e., NPP-5) is marked with red asterisk.**

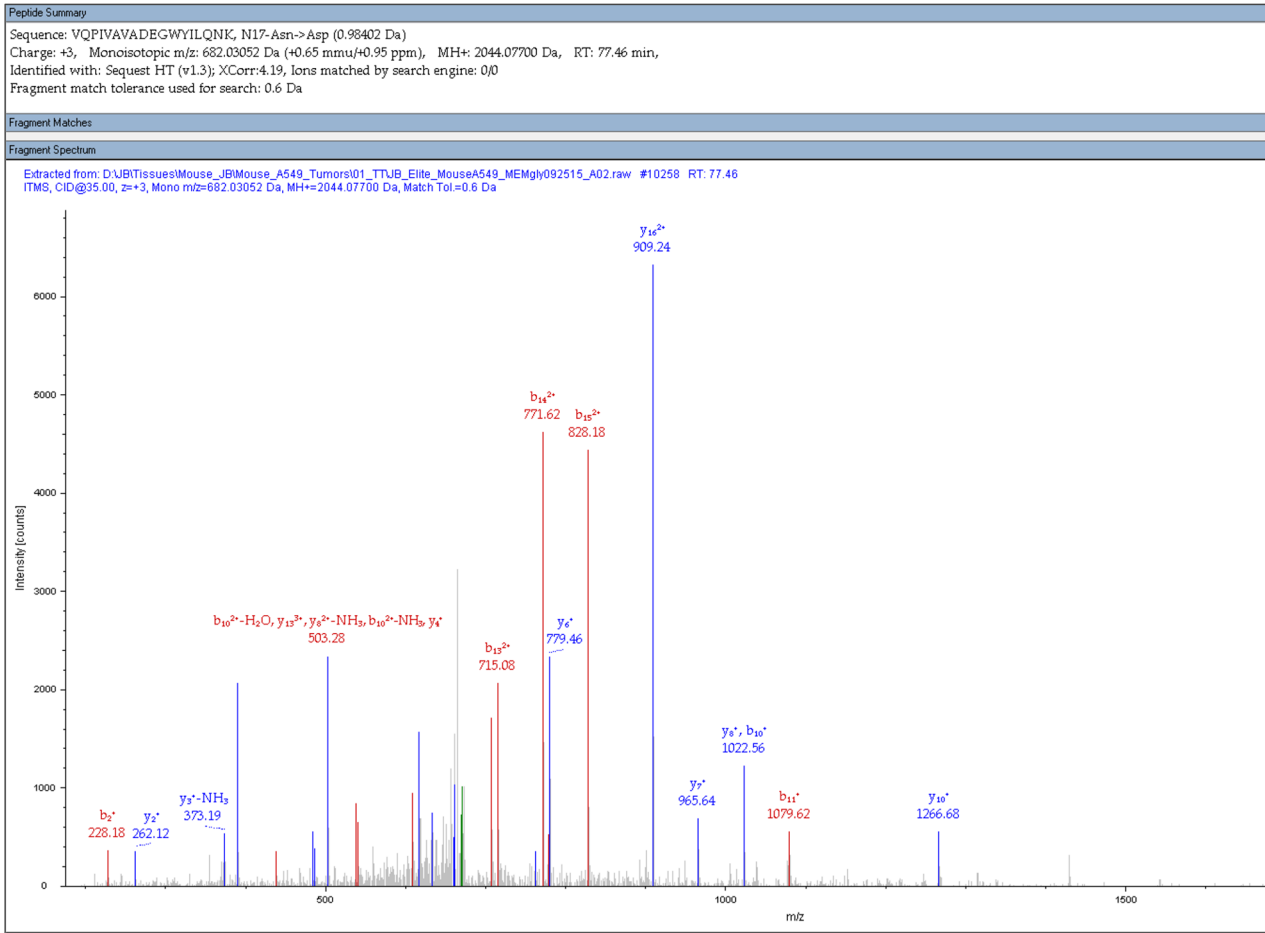

**Supplementary Figure 33: MS<sup>2</sup> spectrum depicting unambiguous identification of the mouse-derived NPP-5 ortholog (i.e., Enpp5 gene product) in tumor stroma by detection of protein- and species-specific N-glycopeptide.**

|                   |                                                                                                     |
|-------------------|-----------------------------------------------------------------------------------------------------|
| Q9UJA9            | ENPP5_HUMAN - Ectonucleotide pyrophosphatase/phosphodiesterase family member 5 Homo sapiens (Human) |
| E-value: 0.0      |                                                                                                     |
| Score: 2152       |                                                                                                     |
| Ident.: 81.8%     |                                                                                                     |
| Positives : 90.6% |                                                                                                     |
| Query Length: 477 |                                                                                                     |
| Match Length: 477 |                                                                                                     |

|        |             |     |                                                                                                      |     |
|--------|-------------|-----|------------------------------------------------------------------------------------------------------|-----|
| Q9EQG7 | ENPP5_MOUSE | 1   | MIPEFLLASCTLATLCHSAFFSLQPEEQKVLVVSFDGFRWDYLYKVTPPHFHYIMKNGVH                                         | 60  |
| Q9UJA9 | ENPP5_HUMAN | 1   | M +FLL S LA L S FSLQP++QKVL+VSPDGFWRDYLKVP <sup>PHFHYIMK</sup> GVH                                   | 60  |
| Q9EQG7 | ENPP5_MOUSE | 61  | VNQVTNVFITKTYPNHYTLVTLGLFAENHGIVANDMFDPIILNKSFSLEHMDIYDSKFWEEA                                       | 120 |
| Q9UJA9 | ENPP5_HUMAN | 61  | V QVTNVFITKTYPNHYTLVTLGLFAENHGIVANDMFDPI NKSFSL+HM+IYDSKFWEEA                                        | 120 |
| Q9EQG7 | ENPP5_MOUSE | 121 | TPIWITNQ <sup>RAGH</sup> S GAAMWPGADVKIHSFPTYLLPYNESVSFEDRVAKII <sup>EWFTAKDPI</sup>                 | 180 |
| Q9UJA9 | ENPP5_HUMAN | 121 | TPIWITNQ <sup>RAGHT</sup> S GAAMWPGTDVKIHKRFP <sup>THYMPYNESVSFEDRVAKII</sup> EWFTSKEPI              | 180 |
| Q9EQG7 | ENPP5_MOUSE | 181 | NLGLYWEEDD <sup>TGH</sup> DVGPDSPLMGSVISD <sup>VH</sup> DKLGYLIKMLKRAKLWNNVNLIVTSDHG                 | 240 |
| Q9UJA9 | ENPP5_HUMAN | 181 | NLGLLYWEDPDDMGHHLG <sup>PDS</sup> PLMG <sup>PVIS</sup> SDIDK <sup>KL</sup> GYLIQMLKRAKLWNTLNLIITSDHG | 240 |
| Q9EQG7 | ENPP5_MOUSE | 241 | MTQCSKQRVIELDRYLDKEHYTLIDHSPVAAILPKREGKFDEVDALAGAH <sup>PNLTVYKKEE</sup>                             | 300 |
| Q9UJA9 | ENPP5_HUMAN | 241 | MTQCS++R+IELD+YLDK+HYTLID SPVAAILPKREGKFDEVY+AL AHPNLT <sup>VYKKE+</sup>                             | 300 |
| Q9EQG7 | ENPP5_MOUSE | 301 | I <sup>PERWHYKH</sup> NDRVQPIVAVADEGWYILQNKSDDFLLGNHGYDNALAE <sup>MHPIFLAHGPAFR</sup>                | 360 |
| Q9UJA9 | ENPP5_HUMAN | 301 | V <sup>PERWHYKYN</sup> SRIQPIIAVADEGWHILQNKSDDFLLGNHGYDNALAD <sup>MHPIFLAHGPAFR</sup>                | 360 |
| Q9EQG7 | ENPP5_MOUSE | 361 | KNFTKEAMNSTDLYSL <sup>LCHLLN</sup> LTA <sup>LPHNGS</sup> FWNVQDLLSSATPKPIPYTQST <sup>TLLGSD</sup>    | 420 |
| Q9UJA9 | ENPP5_HUMAN | 361 | KNF+KEAMNSTDLY LLCHLLN+TA+PHNGSFWNVQDLL+SA P+ +PYTQST LL GS                                          | 420 |
| Q9EQG7 | ENPP5_MOUSE | 421 | KPGEDEQEESYPYIGVSLGSIIAMVFFVVLIKHLIRSQVHTLQYRQVEVAQ <sup>PLLQA</sup>                                 | 477 |
| Q9UJA9 | ENPP5_HUMAN | 421 | KPAEYDQEGSY <sup>PF</sup> IGVSLGSIIVVFFVIFIKHLIHSQIPALQDMHAEIAQ <sup>PLLQA</sup>                     | 477 |

**Supplementary Figure 34: BLAST analysis confirming protein and species specificity of identified N-glycopeptides from stromal mouse-derived NPP-5, Enpp5 gene product.** Underlined in blue are protein and species-specific peptides identified solely in tumor stroma.

**Supplementary Table 1: (A) N-glycosylated human peptides identified in A549 murine tumor xenograft using TCSG. (B) N-glycosylated mouse peptides identified in A549 murine tumor xenograft using TCSG.**

See Supplementary File 1

**Supplementary Table 2: (A) N-glycosylated peptides identified in normal mouse lung tissue using TCSG. (B) N-glycosylated peptides identified in 2D-grown A549 human lung-adenocarcinoma cell line using TCSG.**

See Supplementary File 2

**Supplementary Table 3: (A) All human N-glycopeptides identified in tumor xenograft and 2D-grown A549 cells using TCSG. (B) All mouse N-glycopeptides identified in tumor xenograft and normal mouse lungs using TCSG.**

See Supplementary File 3

**Supplementary Table 4: (A) N-glycosylated mouse proteins identified in tumor xenograft using TCSG. (B) N-glycosylated human proteins identified in tumor xenograft using TCSG.**

See Supplementary File 4

**Supplementary Table 5: (A) All mouse N-glycoproteins identified in tumor xenograft and normal mouse lungs obtained from healthy mice using TCSG. (B) All human N-glycoproteins identified in tumor xenograft and 2D-grown A549 cells using TCSG.**

See Supplementary File 5

**Supplementary Table 6: (A) Mouse-stromal N-glycoproteins identified in tumor xenograft by at least a single species-specific N-glycosylated peptide. (B) Human-parenchymal N-glycoproteins identified in tumor xenograft by at least a single species-specific N-glycosylated peptide.**

See Supplementary File 6

**Supplementary Table 7: (A) N-glycoproteins identified in normal mouse lungs by at least a single species-specific N-glycosylated peptide. (B) N-glycoproteins identified in 2D-grown A549 human lung-denocarcinoma cell line by at least a single species-specific N-glycosylated peptide.**

See Supplementary File 7

**Supplementary Table 8: (A) Stroma-unique mouse proteins revealed by subtractive TCSG analysis. (B) Parenchyma-unique human proteins revealed by subtractive TCSG analysis.**

See Supplementary File 8

**Supplementary Table 9: (A) Stroma-specific protein panel uncovered by compartive subtractive TCSG analysis. (B) Parenchyma-specific protein panel uncovered by compartive subtractive TCSG analysis. (C) A549-specific protein panel uncovered by compartive subtractive TCSG analysis. (C) Normal lung-specific protein panel uncovered by compartive subtractive TCSG analysis.**

See Supplementary File 9

**Supplementary Table 10: Diferently regulated orthologues detected in both tumor parenchyma and tumor stroma by at least one species-specific N-glycosylated peptide.**

See Supplementary File 10

**Supplementary Table 11: (A) Top parenchymal functional protein networks in terms of statistical significance and number of detected interacting protein species. (B) Top stromal functional protein networks in terms of statistical significance and number of detected interacting protein species.**

**See Supplementary File 11**
